# Supplementary material
Source: Royal Society of Chemistry journal article supplement (doi:10.1039/d6cy00352d)
Supplement: d6cy00352d1.pdf [file d6cy00352d1.pdf]

**Supporting information for:**

**Mechanistic insights in the selective catalytic oxidation of glycolaldehyde: an industrially feasible route from biomass to bio-glycolic acid**

Mojgan Heshmat\*, Lotte Bruurs, Frits van der Klis\*, Rajeesh Pazhavelikkakath Purushothaman, Carolien de kovel, Erik Hagberg, Daan S. van Es\*

<sup>a</sup>Wageningen Food & Biobased Research, Bornse Weilanden 9, 6708 WG Wageningen, The Netherlands

<sup>b</sup>Archer Daniels Midland Company, 1001 N Brush College Road, Decatur, IL, 62521, USA

<sup>c</sup>Biometris, Wageningen University & Research, POBox 16, 6700 AA Wageningen, The Netherlands

**Table S1.** DoE experiments: 1wt% glycolaldehyde substrate concentration in 20 mL water, 100 mg 1wt% Pt/C (0.32 mEq Pt), 10 bar oxygen, stirring at 750 rpm.

| Entry | Variables        |                   | Response             |       |  |
|-------|------------------|-------------------|----------------------|-------|--|
|       | Temperature (°C) | Reaction time (h) | Glycolic acid (mol%) | yield |  |
| 1     | 74.9             | 1.52              | 57.6                 |       |  |
| 2     | 61               | 4.28              | 73.1                 |       |  |
| 3     | 74.2             | 6.68              | 85.5                 |       |  |
| 4     | 46.2             | 1.43              | 34.2                 |       |  |
| 5     | 60.1             | 4.12              | 83.5                 |       |  |
| 6     | 47.9             | 6.9               | 68.0                 |       |  |
| 7     | 60.2             | 4.2               | 70.2                 |       |  |
| 8     | 41.4             | 4.23              | 46.7                 |       |  |
| 9     | 60.2             | 8                 | 82.9                 |       |  |
| 10    | 61.3             | 0.47              | 29.4                 |       |  |
| 11    | 60.3             | 4.19              | 70.5                 |       |  |
| 12    | 80               | 4.1               | 73.8                 |       |  |

The equation presenting the estimated surface is:

$$\text{Glycolic acid yield (mol\%)} = -139.5 + 4.63 * \text{temperature} + 18.86 * \text{time} - 0.031 * \text{temperature}^2 + 1.18 * \text{time}^2 - 0.04 * \text{temperature} * \text{time}.$$

### Analytical methods

HPLC analyses were performed on a Waters e2695 HPLC instrument, equipped with a Concise Corogel Ion 300 (30 cm length) column, maintained at 65 °C, using H<sub>2</sub>SO<sub>4</sub> (3 mM) in MilliQ water as the eluent, with a flow rate of 0.4 mL min<sup>-1</sup>. The components were identified using a Waters 2489 UV/Vis Detector (210 nm) and a Waters 2414 RI detector. Glycolaldehyde, glycolic acid, glyoxylic acid, oxalic acid, formaldehyde and formic acid concentrations were determined based on calibration curves of the corresponding components. An overview of all HPLC spectra are displayed in SI Figure S1 A-C.

Table1 – entry 1

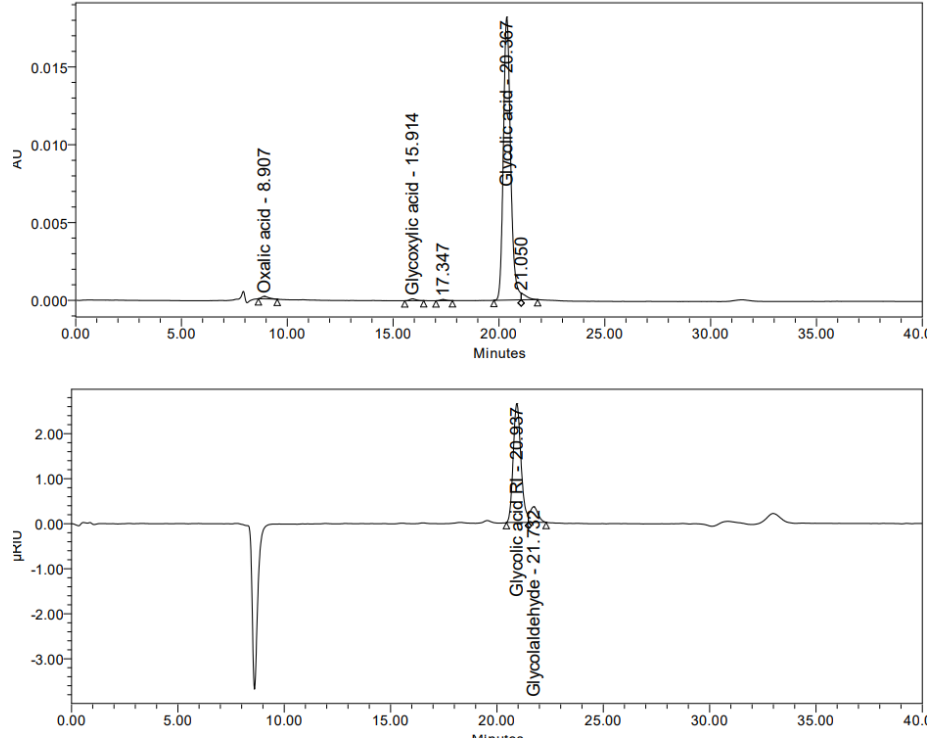

Table1 – entry 2

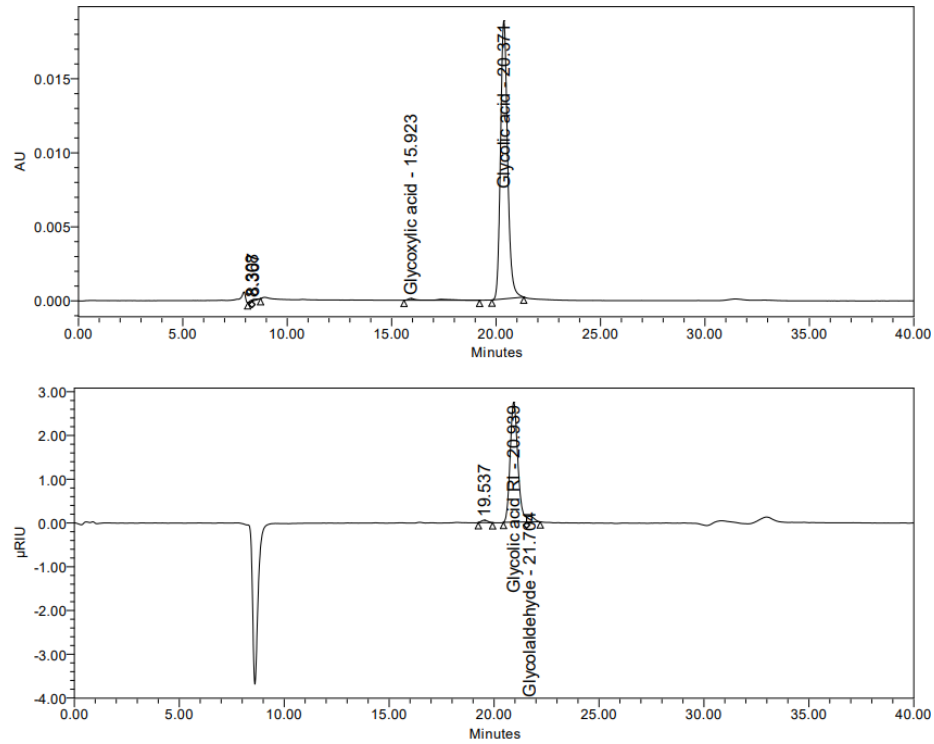

Table 1 – entry 3

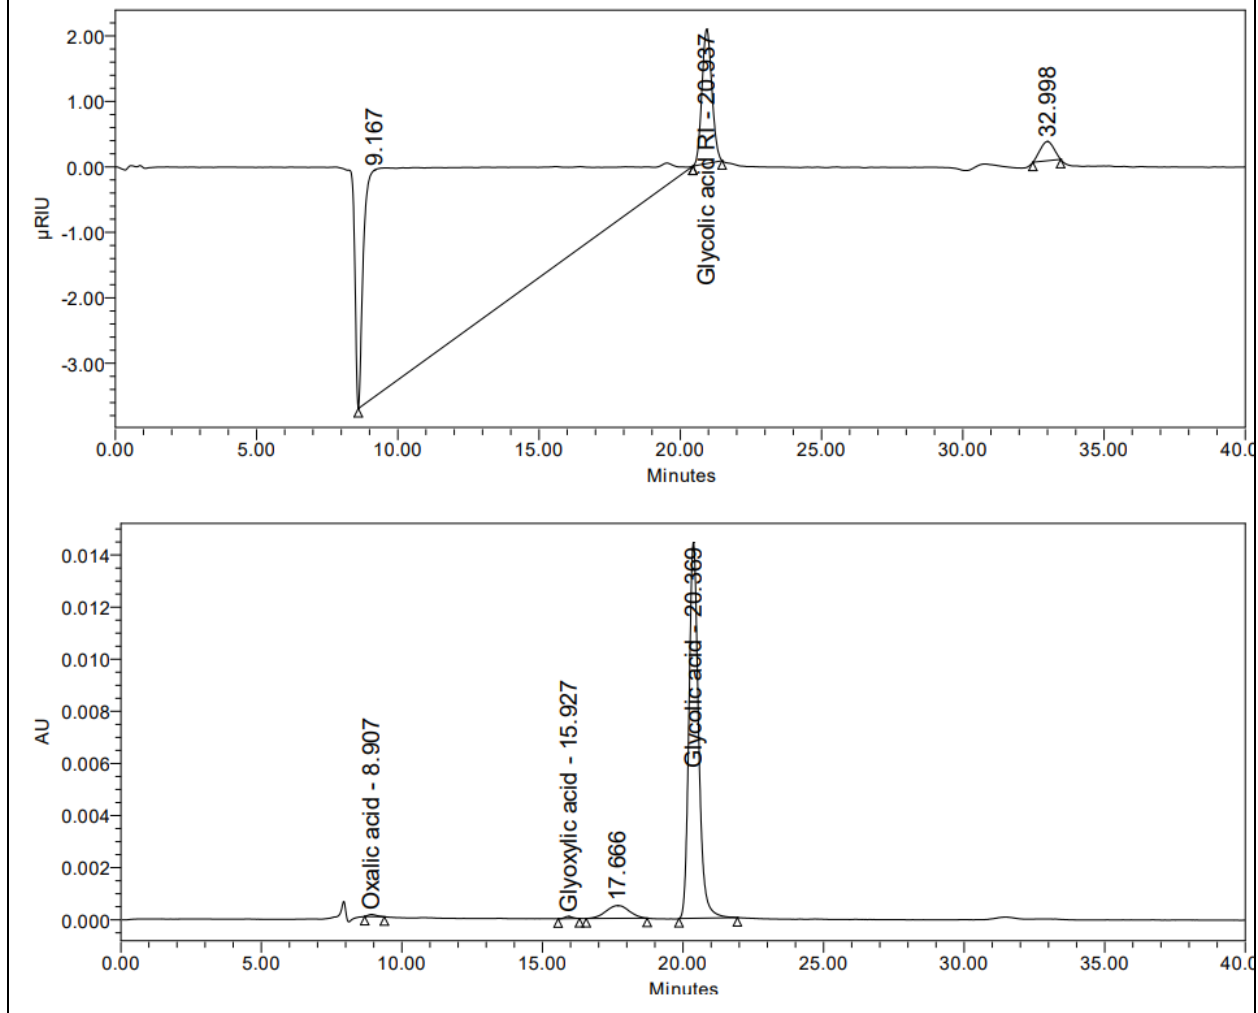

Figure S1A. HPLC chromatograms corresponding to entries 1 - 3 of Table 1 in the main text.

Table3 – entry 1

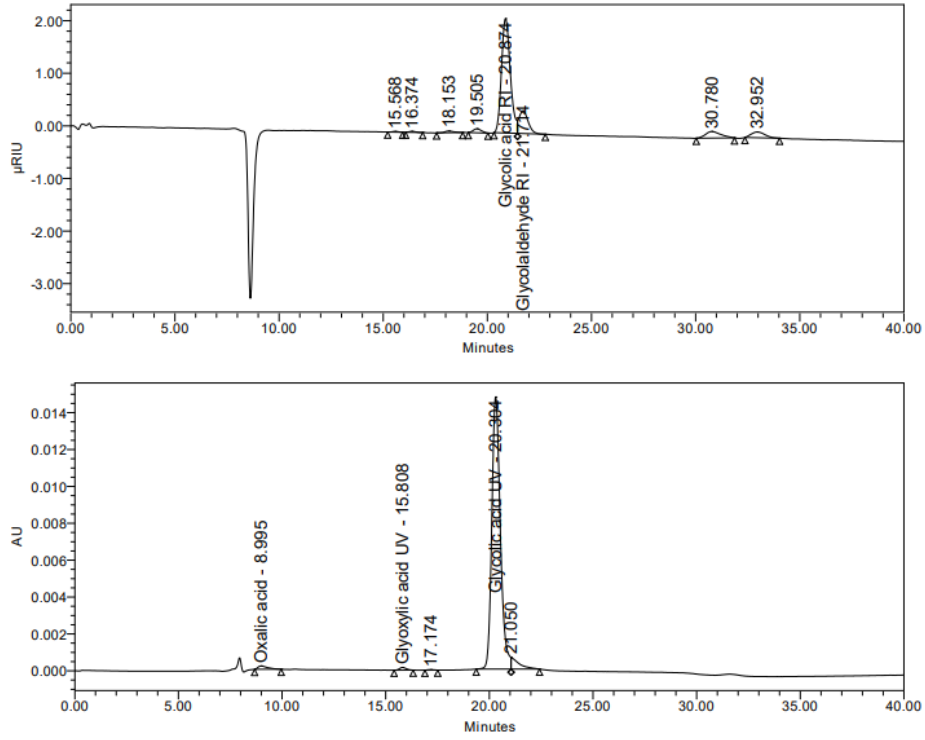

Table3 – entry 2

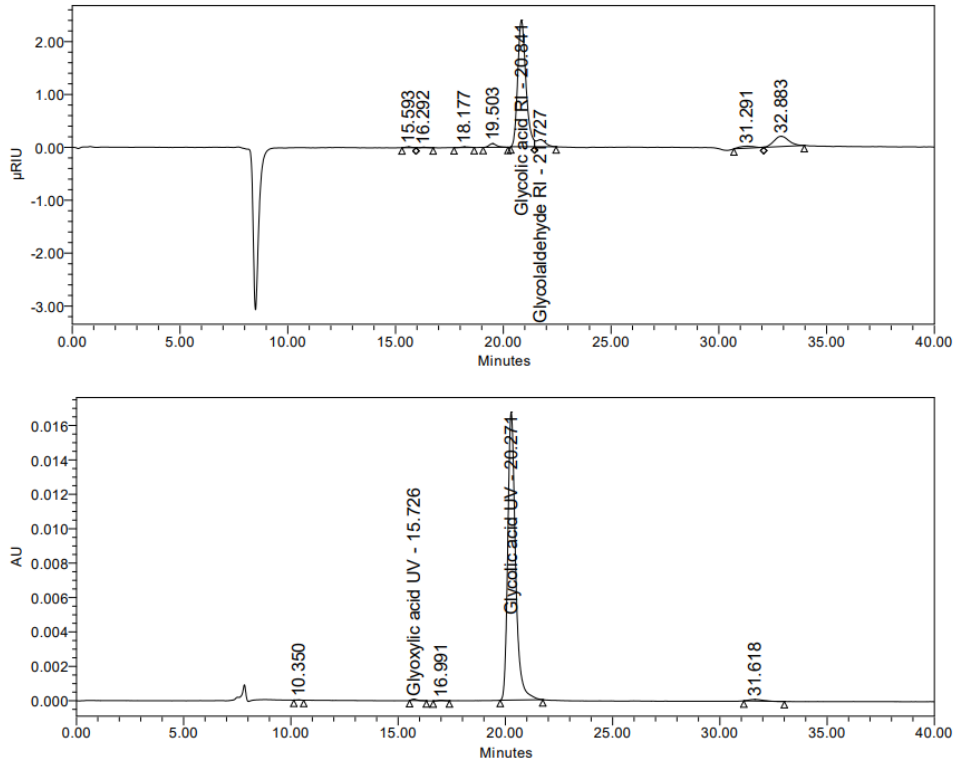

Table3 – entry 3

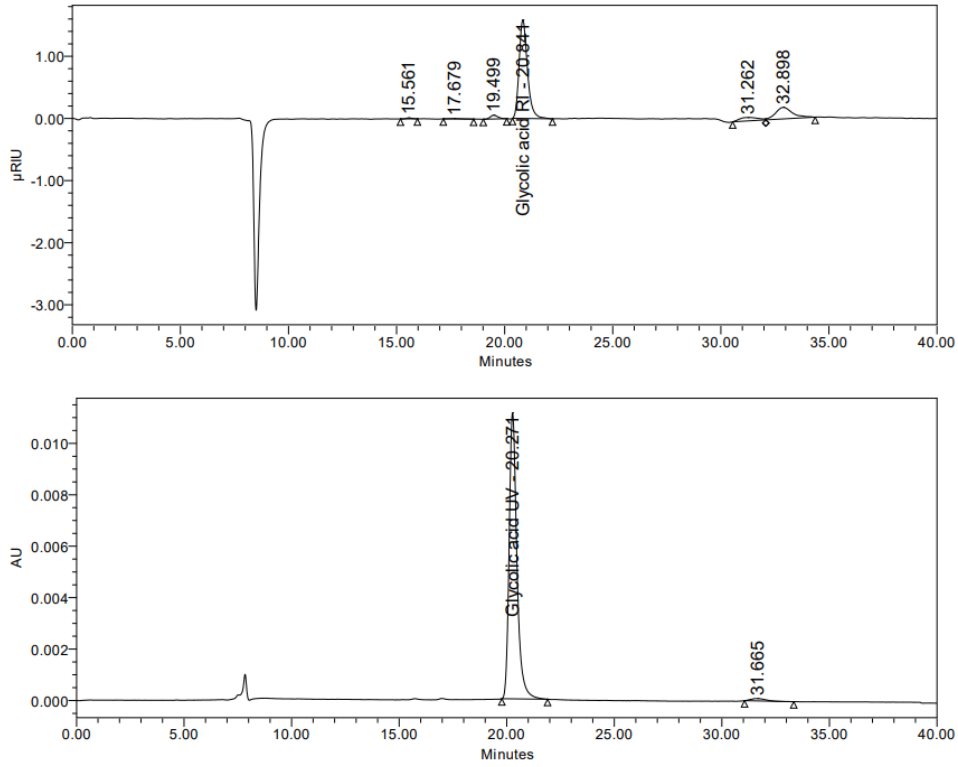

Table 3 – entry 4

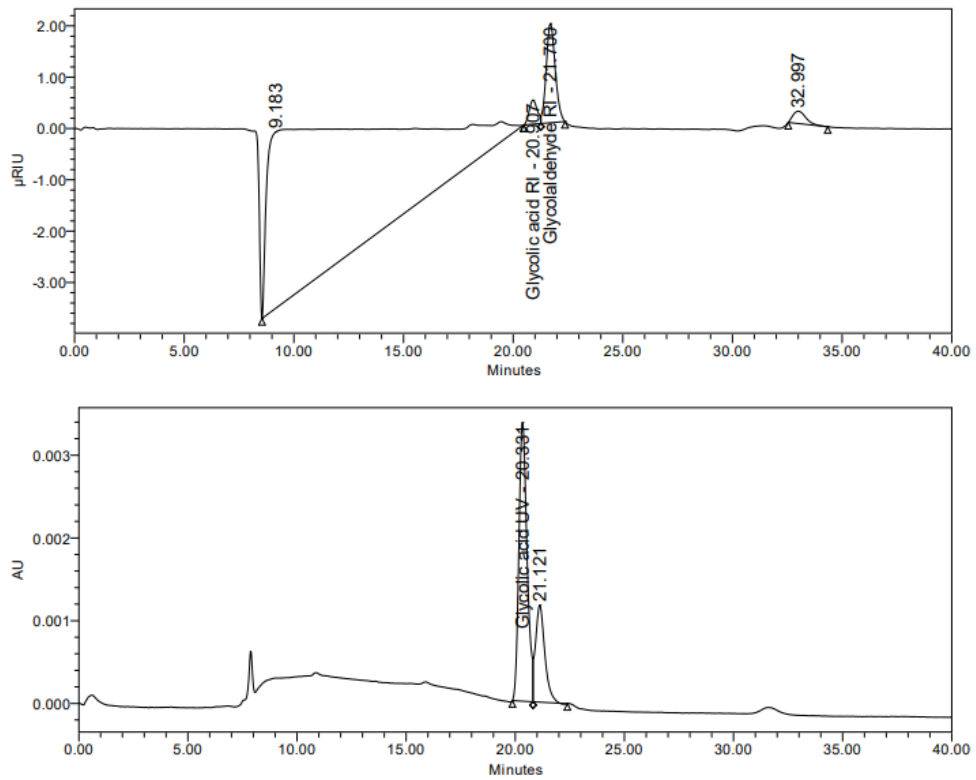

Table 3 – entry 5

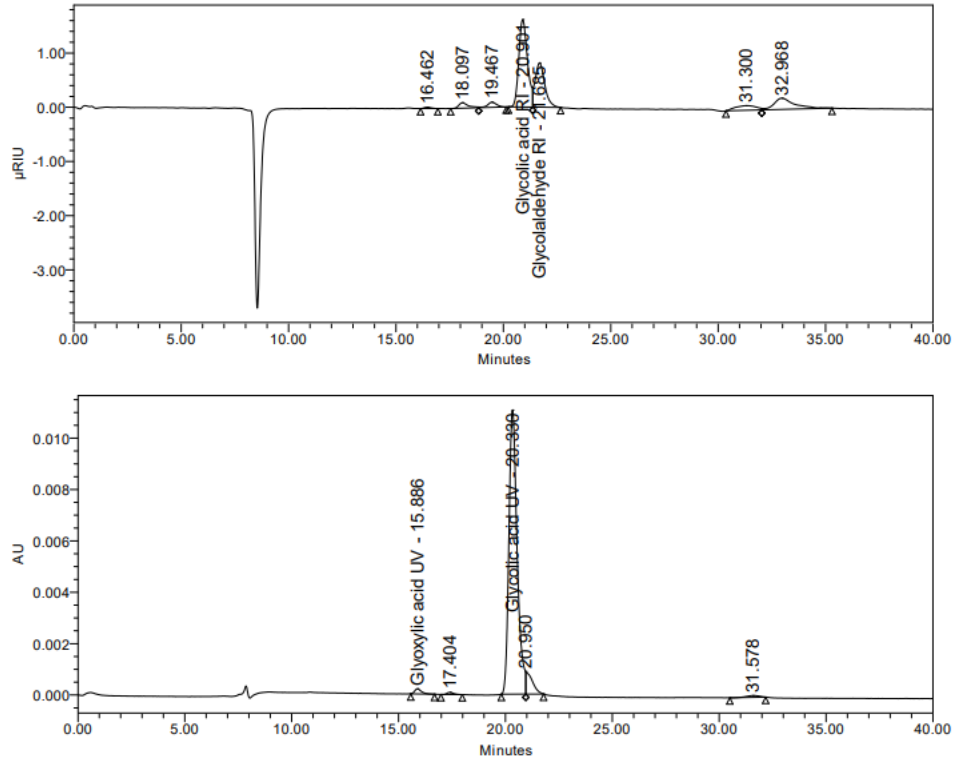

Table 3 – entry 6

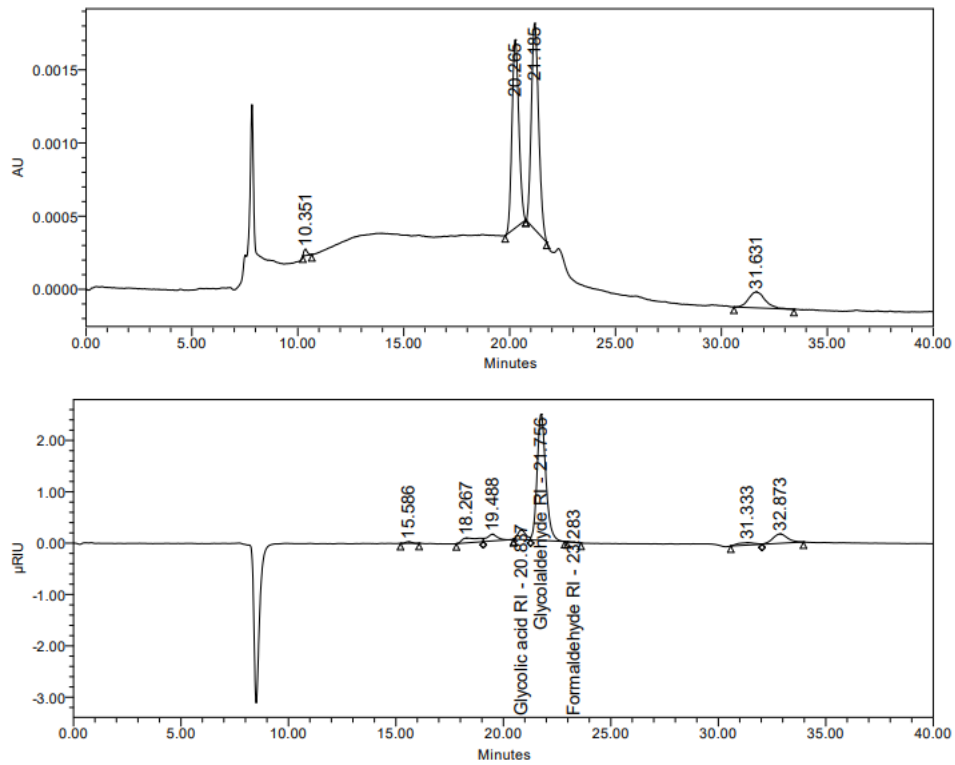

Table 3 – entry 7

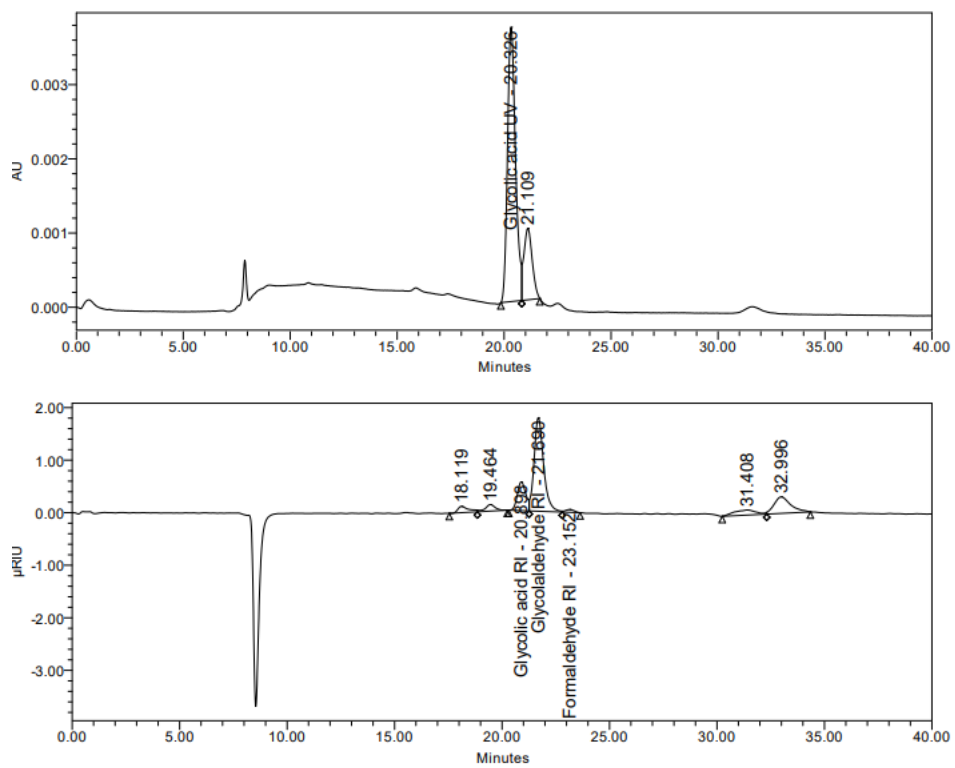

Figure S1B. HPLC chromatograms corresponding to entries 1 – 7 of Table 3 in the main text.

Table4 – entry 2

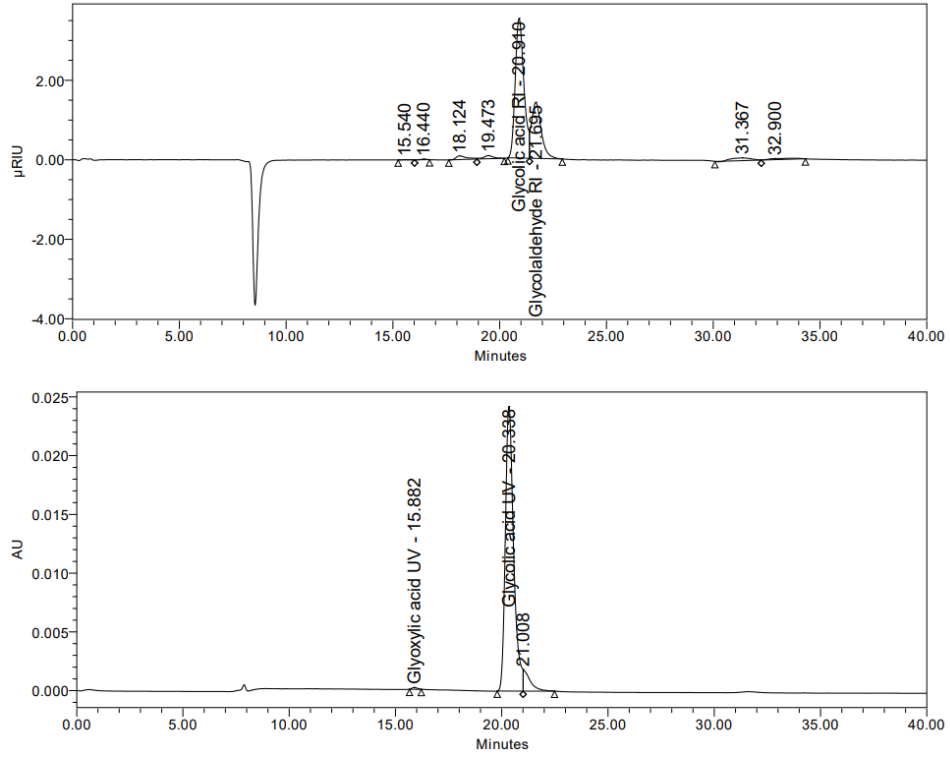

Table4 – entry 3

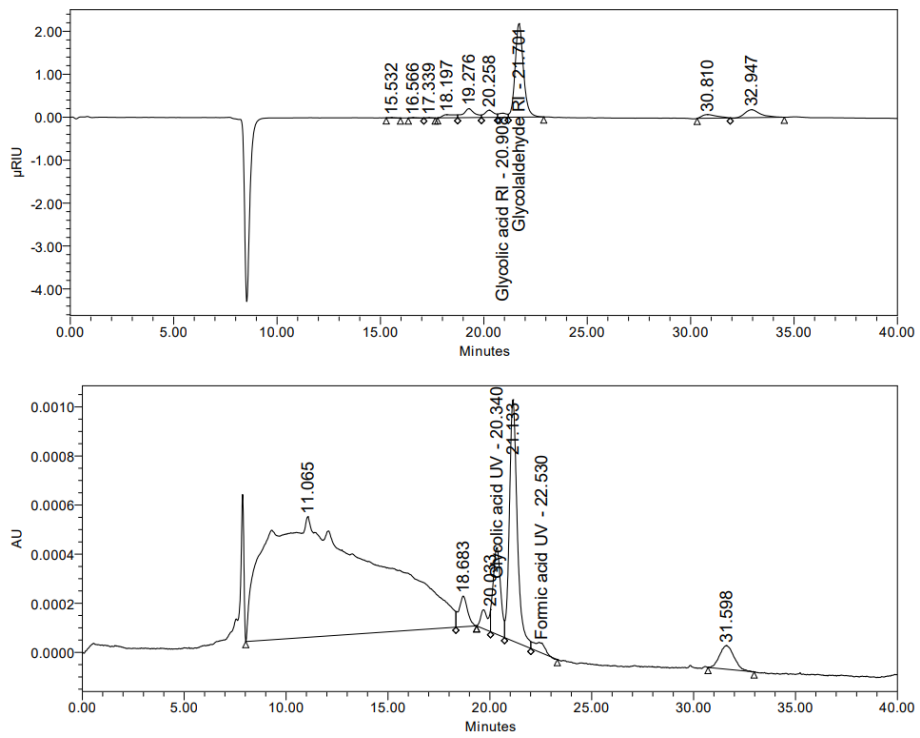

Table4 – entry 4

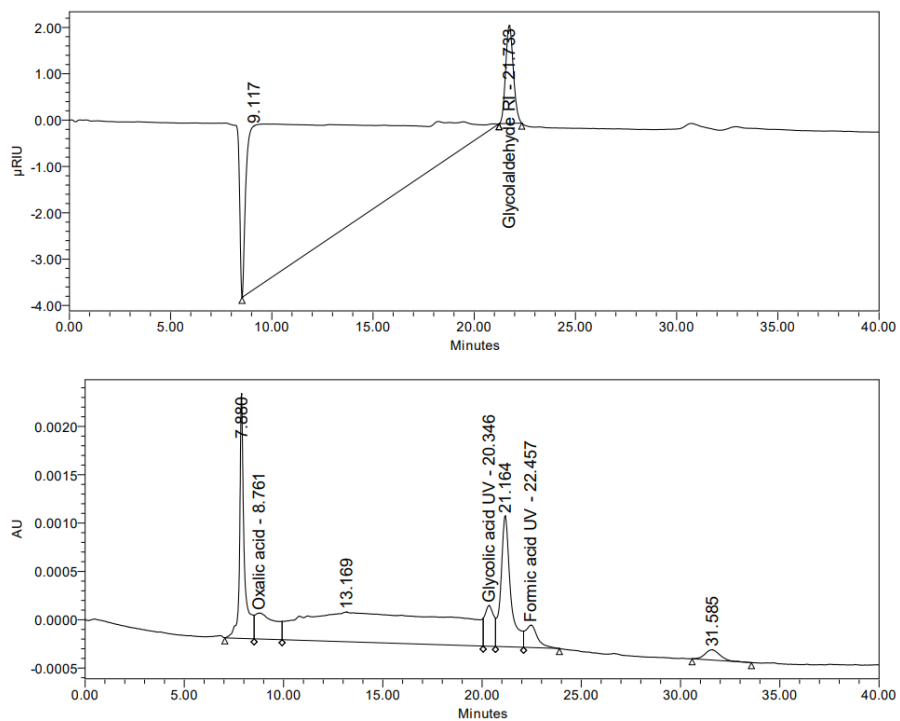

Table4 – entry 5

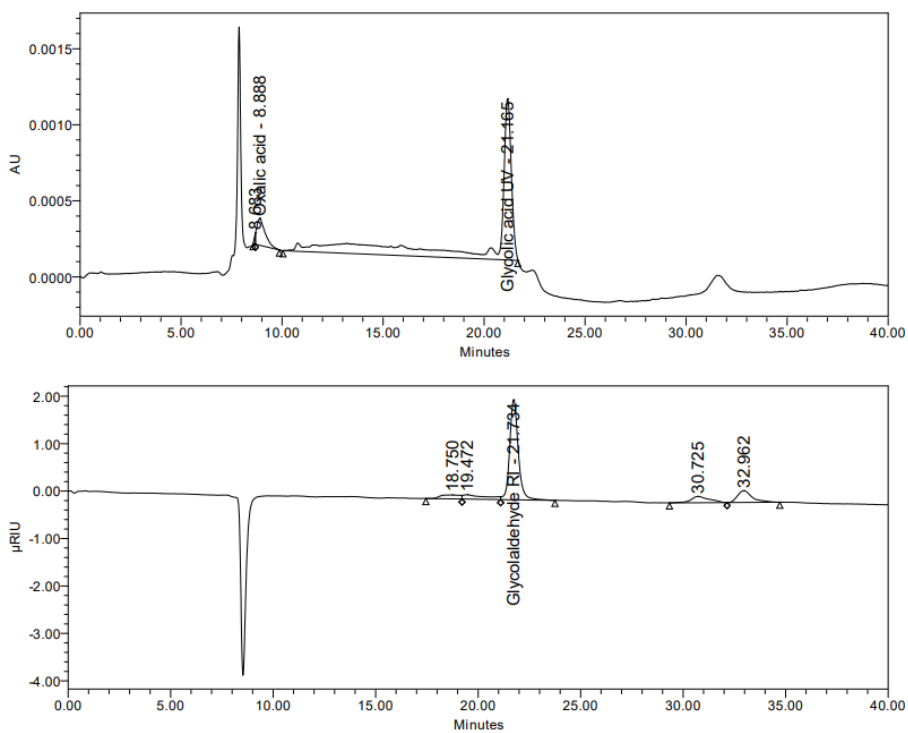

Figure S1C. HPLC chromatograms corresponding to entries 2 - 5 of Table 4 in the main text.

The calibration curves were made by making 1, 2, 4, 6, 8 and 10 mM solutions of the substrates. The corresponding areas in the UV or RI chromatograms were plotted against their respective concentrations. Concentrations of the reaction components can then be calculated from the trendlines of the calibration curves, two examples are show in Figures S1D and S1E.

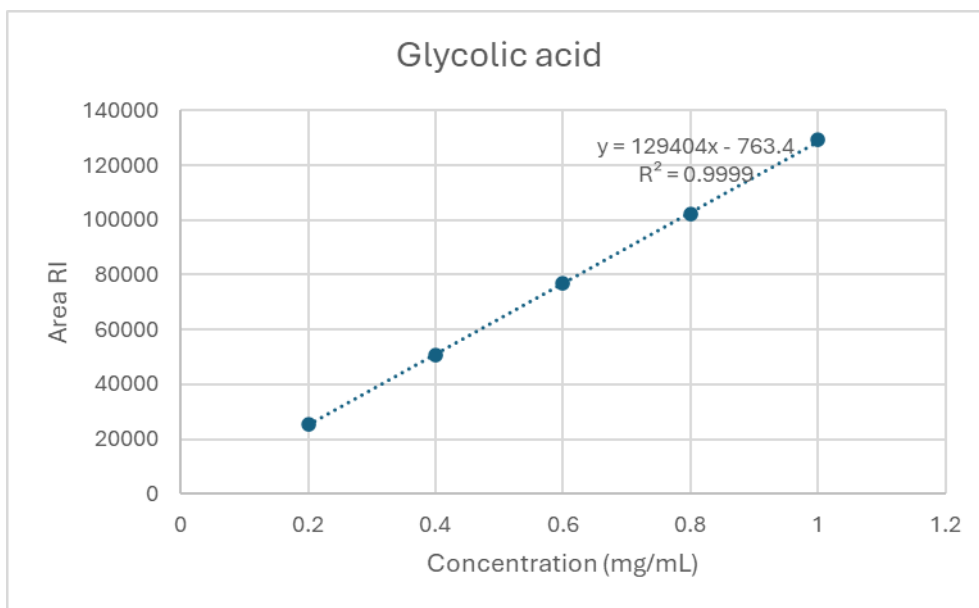

**Figure S1D.** Calibration curve for glycolic acid. Concentration can be calculated using the formula:  $C = (Area+763.4)/129404$ .

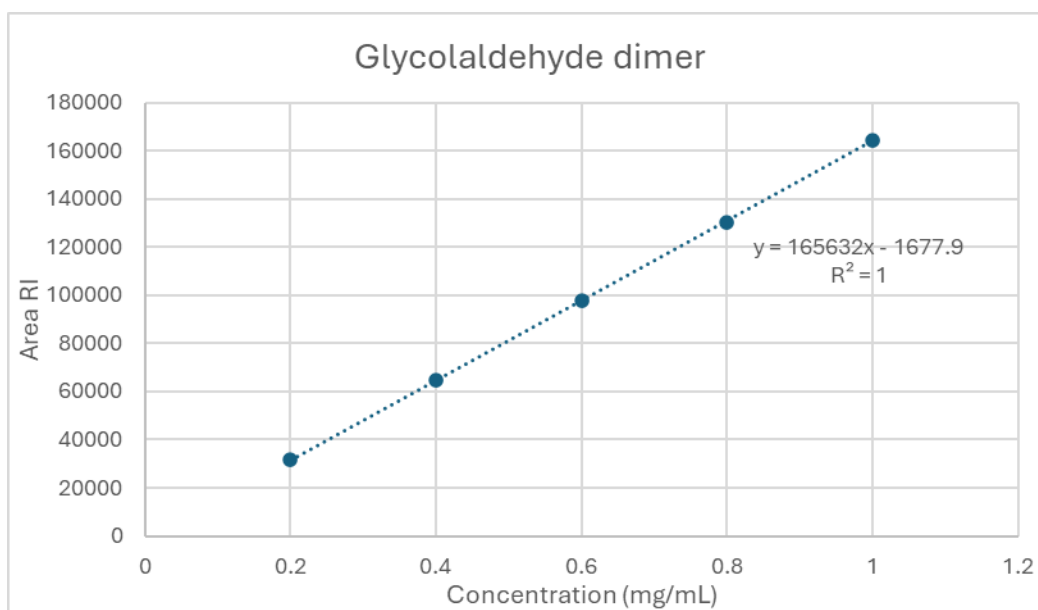

**Figure S1E.** Calibration curve for glycolaldehyde dimer. Concentration can be calculated using the formula:  $C = (Area+1677.9)/165632$ .

The replication error for these measurements lies between 0.4 and 0.7%, **Table S2**.

**Table S2.** Replication errors for glycolaldehyde dimer and glycolic acid.

| Sample             | Glycolaldehyde | Glycolic acid |
|--------------------|----------------|---------------|
| 1                  | 0.91           | 6.15          |
| 2                  | 0.91           | 6.09          |
| 3                  | 0.93           | 6.12          |
| 4                  | 0.91           | 6.09          |
| 5                  | 0.91           | 6.09          |
| Average            | 0.92           | 6.11          |
| Standard Deviation | 0.01           | 0.02          |
| Percent Error      | 0.7            | 0.4           |

Both solvent and eluent are water, which is a neutral, non-interacting solvent, we think they should not result in a serious interaction with the column. Hence, the recovery rate is supposed to be quite high.

All calculations related to the thermodynamics and kinetics of various equilibria of glycolaldehyde in aqueous/acidic solution and in the absence of Pt/C catalyst (the results reported in Table S2) were performed using the ADF software package.<sup>1,2</sup> For each reaction the lowest energy structures of ground and transition states were obtained. The calculations were carried out with the BLYP functional, augmented with Grimme's D3 dispersion correction and the TZ2P basis set. The optimized geometries have been verified to have zero imaginary frequency modes. The transition states were searched based on potential energy scans using linear transit (LT) calculations by employing the corresponding reaction coordinates (distances) for each reaction, starting from and ending at fully converged stable minima in a series of steps. In each LT calculation, all degrees of freedom are fully optimized except the reaction coordinate, which are scanned stepwise.

**Table S2** reports the  $\Delta G$  and  $\Delta G^\ddagger$  from Ref. 47, which have been calculated with including explicit H<sub>2</sub>O molecules. In comparison, we calculated free energy values including explicit glycolic acid and water molecules, since glycolic acid is continuously produced during the reaction. In **Scheme S1** molecule **1** is the starting cyclic glycolaldehyde dimer that can partially hydrolyze to a linear dimer **2** (a thermodynamically favorable and kinetically not very demanding transformation), which can undergo cyclic rearrangements and generate species **3 - 5**. The cyclic rearrangement of glycolaldehyde dimer according to the literature and our calculations (entries **2, 3** and **4** in **Table**

**S1)** show an unfavorable thermodynamic with slightly higher barrier than **1** → **2**. In fact, entries **2** - **4** have the highest barriers (especially in the presence of glycolic acid) within the equilibria shown in **Scheme 1**. Generation of glycolaldehyde monomer by hydrolysis of the dimer (entry **5**) has the most favorable thermodynamics and rather favorable kinetics and therefore is the most dominant equilibrium amongst the others. This implies that in a dilute aqueous solution the dimer is not a stable hydrolyses to the monomer. Formation of glycolaldehyde monomer is followed by a nucleophilic attack by a water molecule on the carbonyl, forming the glycolaldehyde hydrate that is slightly less favorable transformation thermodynamically (0.66 and 1.45 kcal/mol in neutral and acidic environments), however, kinetically favorable due to a lower barrier (16.05 and 15.45 kcal/mol).

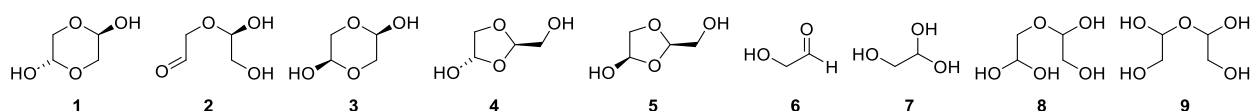

**Scheme S1.** Various forms of glycolaldehyde in solution reported in ref. 47.

In **Figure S2** we have plotted the results of **Table S2** for explicit water molecules.

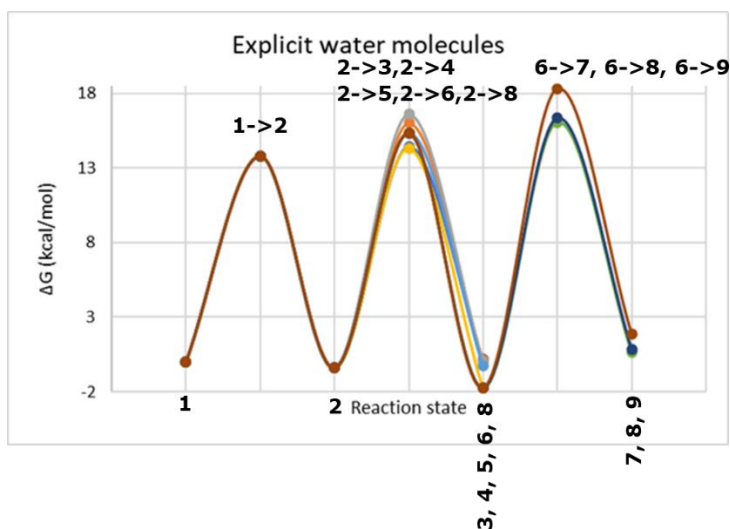

**Figure S2.** The results of **Table S2** for explicit water molecules (ref. 47).

**Table S2.** The  $\Delta G$  and  $\Delta G^\ddagger$  values reported in Ref. 47 for the species shown in **Scheme 1**, which have been calculated including the explicit and implicit  $H_2O$  environment in comparison to calculated values in this work with explicit glycolic acid (GA) molecules instead of water.

| Entry    | Reaction                            | $\Delta G$ (thermodynamics)           |                                       | $\Delta G^\ddagger$ (Kinetics)        |                                       |
|----------|-------------------------------------|---------------------------------------|---------------------------------------|---------------------------------------|---------------------------------------|
|          |                                     | Ref. <sup>47</sup> (H <sub>2</sub> O) | Calculated in this work (explicit GA) | Ref. <sup>47</sup> (H <sub>2</sub> O) | Calculated in this work (explicit GA) |
| <b>1</b> | <b>1 -&gt; 2</b>                    | <b>-0.42</b>                          | <b>-1.44</b>                          | <b>13.79</b>                          | <b>12.92</b>                          |
| 2        | 2 -> 3                              | 0.16                                  | 0.46                                  | 14.43                                 | 20.07                                 |
| 3        | 2 -> 4                              | 0.12                                  | 3.80                                  | 16.01                                 | 25.81                                 |
| 4        | 2 -> 5                              | 0.02                                  | 1.85                                  | 16.61                                 | 24.31                                 |
| <b>5</b> | <b>2 -&gt; 6 + 6</b>                | <b>-1.76</b>                          | <b>-2.81</b>                          | <b>14.31</b>                          | <b>13.40</b>                          |
| 6        | 2 +<br>H <sub>2</sub> O(GA) -><br>8 | -0.24                                 | -1.13                                 | 15.34                                 | 18.21                                 |
| 7        | 6 +<br>H <sub>2</sub> O(GA) -><br>7 | 0.66                                  | 1.45                                  | 16.05                                 | 15.45                                 |
| 8        | 6 + 7 -> 8                          | 0.86                                  | 1.76                                  | 16.37                                 | 18.25                                 |
| 9        | 6 + 7 -> 9                          | 1.86                                  | 3.11                                  | 18.31                                 | 23.7                                  |

According to the reported data in **Table S2** and previous experimental studies, glycolaldehyde dimer hydrolyses in water to the monomeric hydrate (entry 5 in **Table S2**). Studies performed by NMR and FTIR spectroscopies at room temperature in D<sub>2</sub>O identified the presence of at least four molecular species as shown in **Scheme 2**. As can be seen in **Scheme 2**, the predominant species in the mixture is the hydrate form of glycolaldehyde (70%).

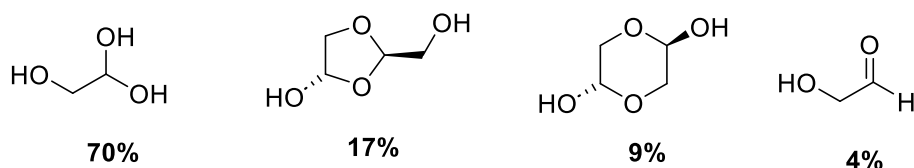

**Scheme S2.** Various forms of glycolaldehyde in solution reported by NMR and FTIR spectroscopies (ref. 51 and 52). The hydrated species has the highest percentage (70%) and the dominant form of glycolaldehyde in aqueous solution.

### Interactions between Pt atoms and reacting species

The optimized geometries obtained by CP2K and using the same computational method (periodic calculations) described in the main text. We removed <sup>3</sup>O<sub>2</sub> and water molecules in order to calculate the pure interaction between substrate and product molecules with the catalyst. Analysis of the

Mulliken atomic charges for the hexagonal C support as well as Pt<sub>4</sub> cluster are provided in **Figure S3** for free support and free Pt<sub>4</sub> cluster and when they complexed. In a free symmetric C support structure (**Figure S3A**), according to the atomic charges, three types of carbon atoms are distinguished and shown. Upon Pt<sub>4</sub> complexation the charge distribution is perturbed and as can be seen in **Figure S3B** each carbon atom has a different charge and the symmetric pattern of charge distribution completely changes. The increase of positive and negative atomic charges on the C support can also increase the electronic interaction with the present species (reactant, intermediate and product) in the reaction medium. Similarly, for Pt<sub>4</sub> cluster atomic charge perturbation has been shown in **Figure S3 C and D**.

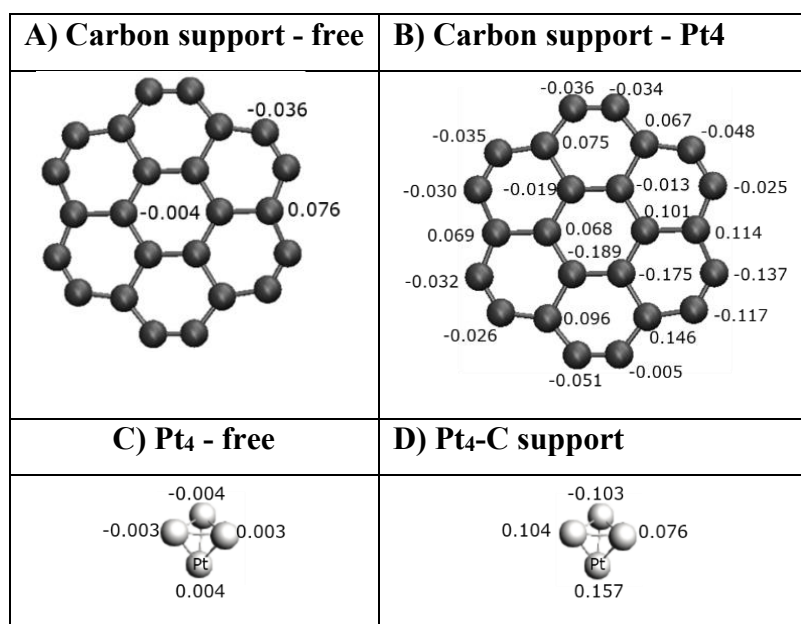

**Figure S3.** A) Symmetric free carbon support and three atomic charges correlated to the surface, B) perturbation of the carbon atomic charges after Pt<sub>4</sub> complexation., C) free Pt<sub>4</sub> cluster, D) Pt<sub>4</sub> cluster after complexation to the support.

In **Table S3** we have summarized the atomic charges of the interacting atoms with the Pt<sub>4</sub> in comparison to those in the free molecules. The corresponding molecular complexes are shown in **Figure S4**.

**Table S3.** The atomic charges of the interacting atoms with the Pt<sub>4</sub> in comparison to the atomic charge (for the same atom) in free molecules

| Atomic charge (bold atom in the functional group) | Free molecule (FM) | Molecular complex with Pt (MC) | Difference MC vs. FM |
|---------------------------------------------------|--------------------|--------------------------------|----------------------|
| Glycolaldehyde (C=O)                              |                    |                                |                      |
| <b>C</b> (C=O)                                    | +0.560             | +0.600                         | <b>+0.040</b>        |
| <b>H</b> (C=O)                                    | -0.171             | -0.180                         | -0.009               |
| Glycolaldehyde (OH)                               |                    |                                |                      |
| <b>O</b> (OH)                                     | -0.528             | -0.563                         | -0.035               |
| <b>H</b> (OH)                                     | +0.226             | +0.312                         | <b>+0.086</b>        |
| Glycolaldehyde Hydrate                            |                    |                                |                      |
| <b>H<sup>+</sup></b> (OH)                         | +0.221             | +0.268                         | <b>+0.047</b>        |
| <b>H</b> (C-H)                                    | -0.167             | -0.182                         | -0.015               |
| <b>O</b> (OH)                                     | -0.528             | -0.593                         | -0.065               |
| Glycolic acid (OH)                                |                    |                                |                      |
| <b>H<sup>+</sup></b> (OH)                         | +0.245             | +0.281                         | +0.036               |
| <b>H</b> (CH <sub>2</sub> )                       | -0.078 / -0.099    | -0.132 / -0.151                | -0.054/-0.052        |
| Glycolic acid (COOH)                              |                    |                                |                      |
| <b>C</b> (C=OOH)                                  | +0.639             | +0.728                         | +0.089               |
| <b>O</b> (C=OOH)                                  | -0.497             | -0.528                         | -0.031               |
| Glycolic acid (COO <sup>-</sup> )                 |                    |                                |                      |
| <b>C</b> (C=OO)                                   | +0.639 (COOH)      | +0.665                         | +0.026               |
| <b>O</b> (C=OO)                                   | -0.497 (COOH)      | -0.699                         | -0.202               |
| Glyoxylic acid (C=O)                              |                    |                                |                      |
| <b>H</b> (C=O)                                    | -0.096             | -0.107                         | -0.011               |
| <b>C</b> (C=O)                                    | +0.542             | +0.647                         | <b>+0.105</b>        |
| Glyoxylic acid (COOH)                             |                    |                                |                      |
| <b>C</b> (C=OOH)                                  | +0.646             | +0.693                         | +0.047               |
| <b>O</b> (C=OOH)                                  | -0.463             | -0.611                         | -0.148               |

| Glyoxylic acid (COO <sup>-</sup> ) |               |        |               |
|------------------------------------|---------------|--------|---------------|
| C(C=OO)                            | +0.646 (COOH) | +0.677 | +0.031        |
| O(C=OO)                            | -0.463 (COOH) | -0.634 | -0.171        |
| Formaldehyde                       |               |        |               |
| C(C=O)                             | +0.722        | +0.843 | <b>+0.121</b> |
| H(C=O)                             | -0.438        | -0.533 | -0.095        |
| Formaldehyde hydrate               |               |        |               |
| H <sup>+</sup> (OH)                | +0.245        | +0.308 | +0.063        |
| H(C-H)                             | -0.161        | -0.198 | -0.037        |
| O(OH)                              | -0.543        | -0.595 | -0.052        |
| Formic acid (COOH)                 |               |        |               |
| C(C=OOH)                           | +0.772        | +0.854 | <b>+0.082</b> |
| O(C=OOH)                           | -0.431        | -0.612 | -0.181        |
| Formic acid (COO <sup>-</sup> )    |               |        |               |
| C(C=OO)                            | +0.772        | +0.915 | <b>+0.143</b> |
| O(C=OO)                            | -0.431        | -0.649 | -0.218        |
| Oxalic acid (COOH)                 |               |        |               |
| C(C=OOH)                           | +0.640        | +0.719 | +0.079        |
| O(C=OOH)                           | -0.452        | -0.533 | -0.081        |
| Oxalic acid (COO <sup>-</sup> )    |               |        |               |
| C(C=OO)                            | +0.640        | +0.611 | -0.290        |
| O(C=OO)                            | -0.452        | -0.646 | -0.194        |

A) Glycolaldehyde – via C=O (-19.78 kcal/mol)

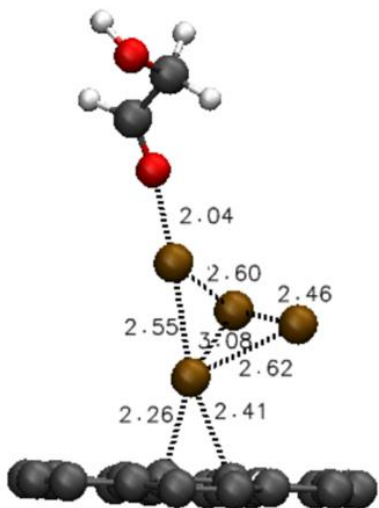

B) Glycolaldehyde - via OH (-23.25 kcal/mol)

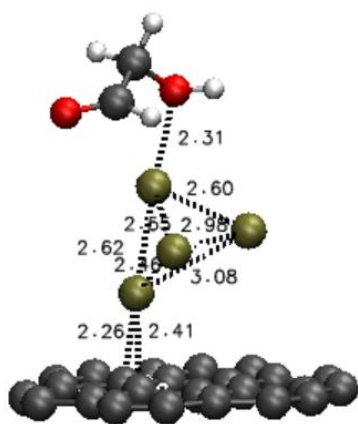

C) Glycolaldehyde hydrate (-25.18 kcal/mol)

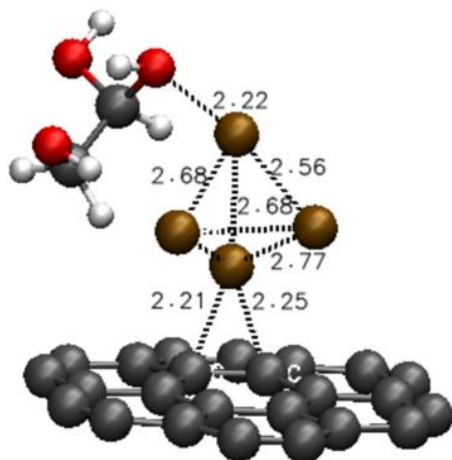

D) Glycolic acid – via OH (-19.00 kcal/mol)

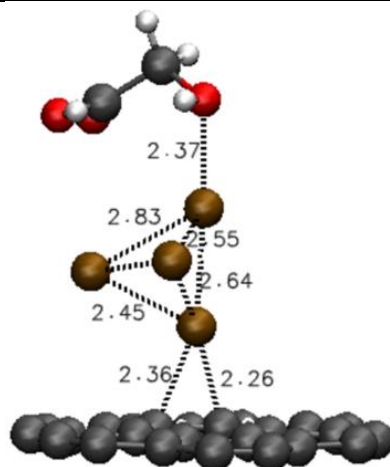

E) Glycolic acid – via (COOH)C=O (-16.08 kcal/mol)

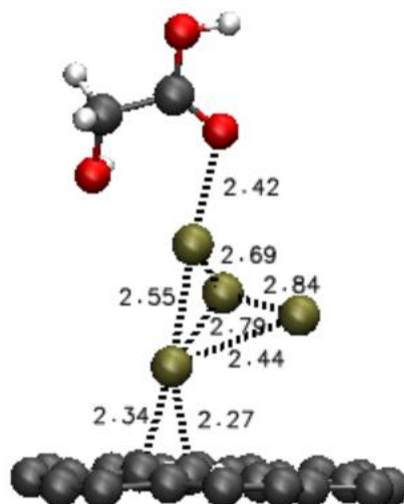

F) Glycolic acid – via COO<sup>-</sup> (-33.09 kcal/mol)

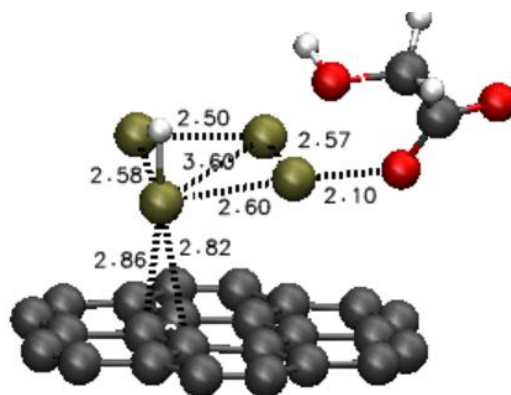

G) Glyoxylic acid - via (CHO)C=O (-28.83 kcal/mol)

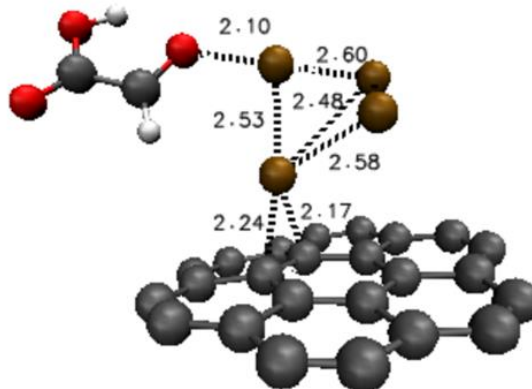

**H)** Glyoxylic acid – via (COOH)C=O (-19.12 kcal/mol)

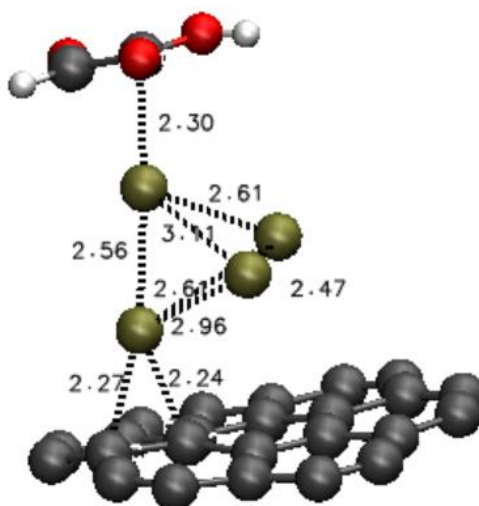

**I)** Glyoxylic acid – via COO<sup>-</sup> (-32.07 kcal/mol)

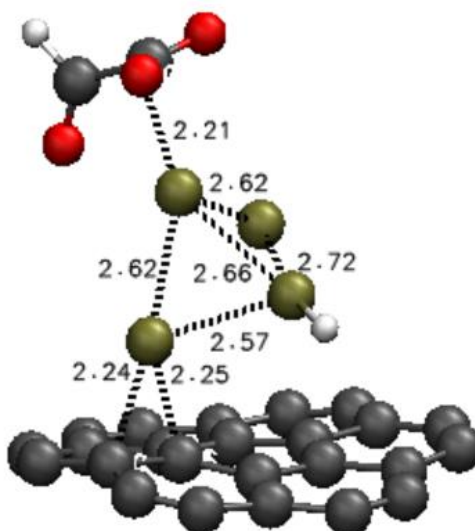

**J)** Glyoxylic acid – hydrate (-33.66 kcal/mol)

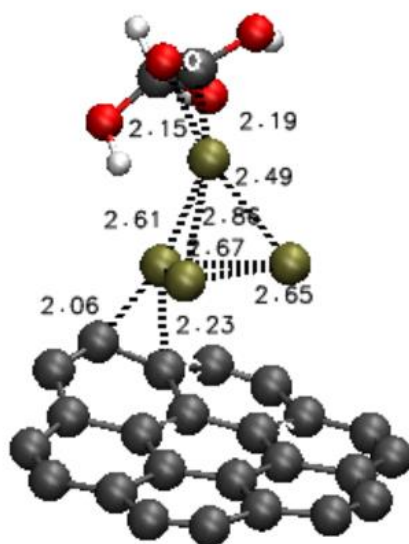

**K)** Formaldehyde (-16.33 kcal/mol)

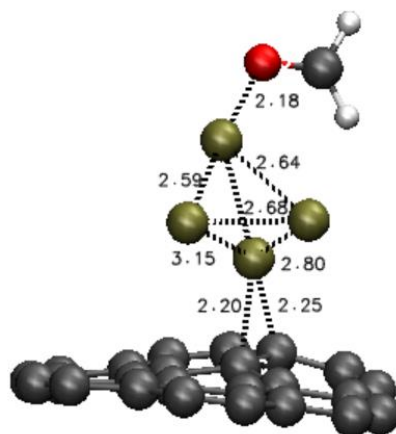

**L)** Formaldehyde-hydrate (-14.33 kcal/mol)

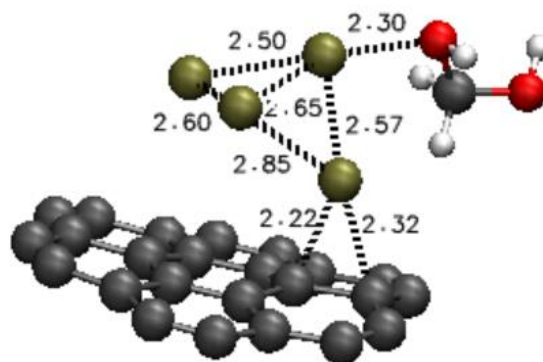

**M)** Formic acid COOH (-13.9 kcal/mol)

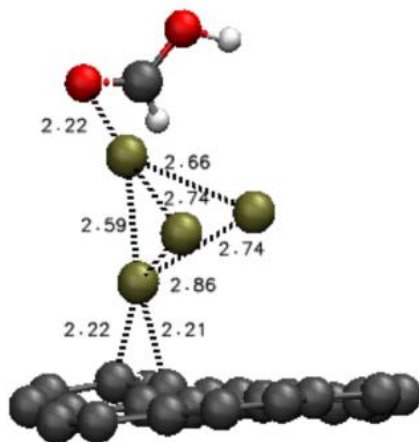

N) Formic acid  $\text{COO}^-$  (-29.9 kcal/mol)

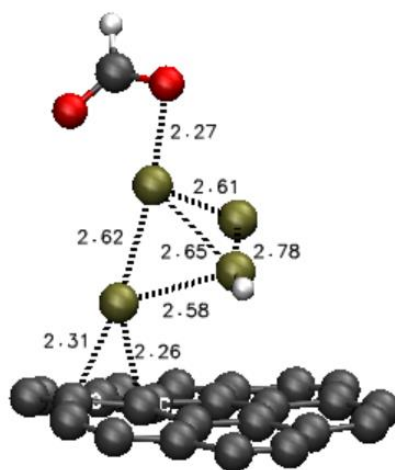

O) Oxalic acid  $\text{COOH}$  (23.08 kcal/mol)

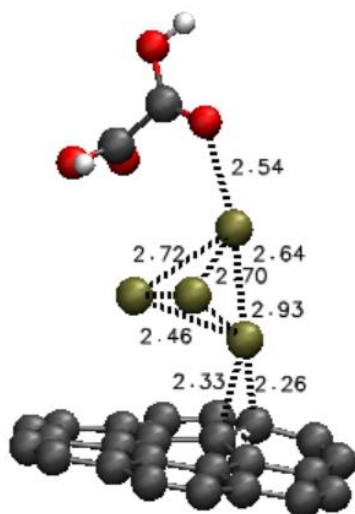

**Figure S4.** Complexation of the reactant molecules to the Pt<sub>4</sub>, the corresponding atomic charges of the functional groups are listed in **Table S3**. The numbers in parentheses show the complexation energies in kcal/mol obtained from eq. 1.

$$\Delta E_{\text{Complexation}} = E_{\text{Complex}} - (E_{\text{substate}} + E_{\text{Catalyst}}) \quad \text{eq. 1}$$

We note that the binding energy of Pt<sub>4</sub> on the C<sub>6</sub> cluster is -88.31 kcal/mol (Pt-C distances between 2.00 – 2.40 Å), which is stronger than Pt<sub>4</sub> cluster formation energy, and this prohibits agglomeration of Pt atoms. For comparison, we calculated the complexation energies of all functional groups present in the molecular structures such as OH, C=O, COOH and COO<sup>-</sup> that can be generated via acidic proton transfer to the Pt<sub>4</sub> catalyst. As seen in **Figure S4**, the structures with carbonyl group, i.e., glycolaldehyde and glyoxylic acid have the shortest O-Pt bond distances (2.04 Å and 2.10 Å, respectively). **Table S3** shows upon complexation to the Lewis acidic Pt sites the C(C=O) gain positive charge and H<sup>-</sup> in H(C=O) atomic charge become more negative versus the free glycolaldehyde. In case of glycolaldehyde hydrate the similar effect related to the complexation to the Pt center can be observed for the O-H group, i.e., increase of the positive and negative charge of H<sup>+</sup> and oxygen (respectively) on the OH and increase of the negative charge on the H. Glycolic acid is complexed to the Pt atom via the OH group and due to this complexation the positive charge on the H<sup>+</sup> and negative charges on H(CH<sub>2</sub>) increase. Glyoxylic acid with the strongest energy of complexation amongst the other molecules shows the highest atomic charge perturbation (highest activation) due to complexation to the Pt centers. To summarize, the interaction between glycolaldehyde hydrate...Pt and glyoxylic acid...Pt are the strongest and this facilitates the easier activation of these molecules in the entire reaction process and results in a faster conversion of glycolaldehyde to glycolic acid.

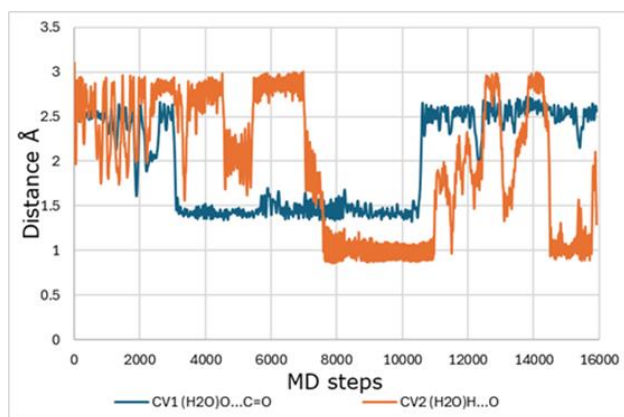

**Figure S5.** Variation of the CVs corresponds to the Figure 8A, glyoxylic acid to glyoxylic acid hydrate.

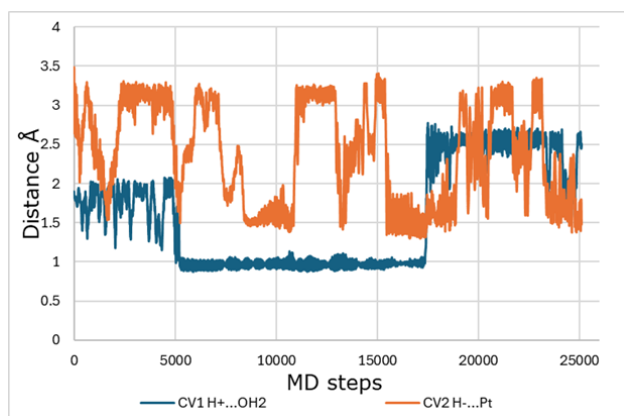

**Figure S6.** Variation of the CVs corresponds to the Figure 8B, glyoxylic acid hydrate to oxalic acid.

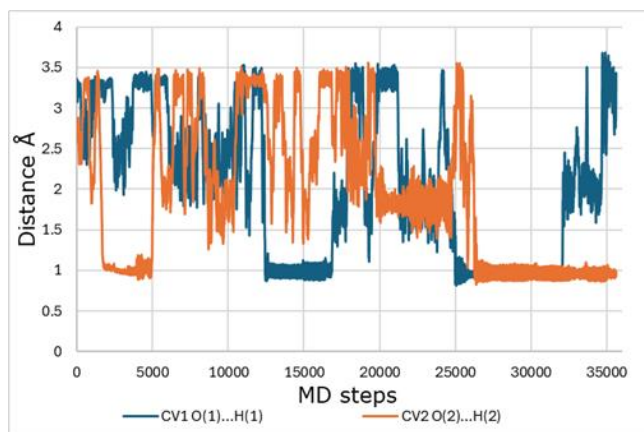

**Figure S7.** Variation of the CVs corresponds to the Figure 13A, Pt...H<sup>+</sup>/H<sup>-</sup> interaction with O<sub>2</sub> and formation of H<sub>2</sub>O<sub>2</sub>.

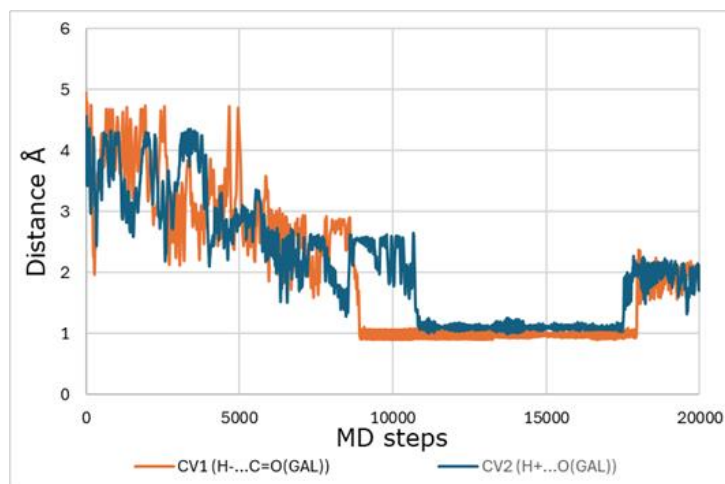

**Figure S8.** Variation of the CVs corresponds to the Figure 13B,  $\text{Pt}\cdots\text{H}^+/\text{H}^-$  interaction with glycolaldehyde and formation of ethylene glycol.

Oxygen and water molecules available in the reaction environment can strongly interact with the Lewis acidic Pt atoms and make Pt-O bonds. Due to this interaction O<sub>2</sub> and H<sub>2</sub>O molecules are activated and dissociate to oxygen, hydrogen and OH atoms on the Pt surface and further react with the reactant and product species in the reaction environment. To investigate the energetic of O<sub>2</sub> and H<sub>2</sub>O dissociation on the Pt atoms we performed MTD simulations and calculated the corresponding free energetics for these transformations. It turned out that at 343 K H<sub>2</sub>O and O<sub>2</sub> dissociations need 16.0 and 14.0 kcal/mol activation energies, respectively, which is achievable under the current reaction conditions.

### Glycolaldehyde (GAI) monomer

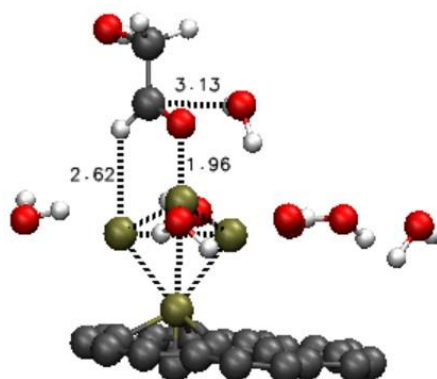

### TS – GAI to Glycolic acid (GAc)

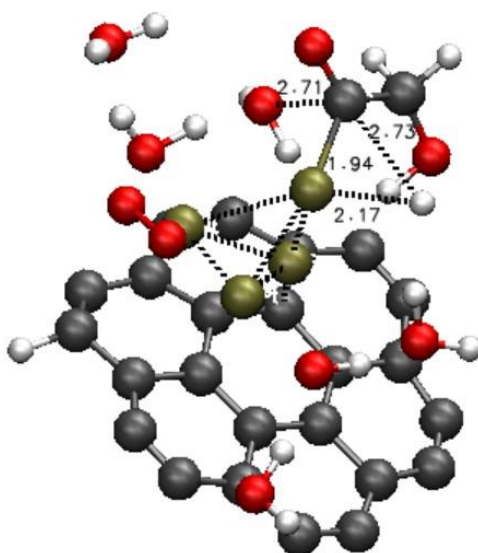

### Glycolic acid

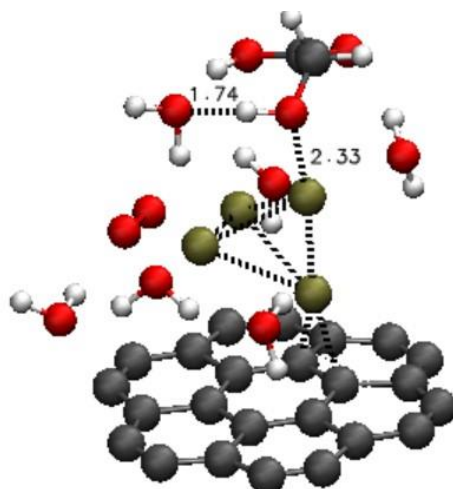

**Figure S9.** Molecular structures corresponding to the FESs of **Figure 2** in the main text.

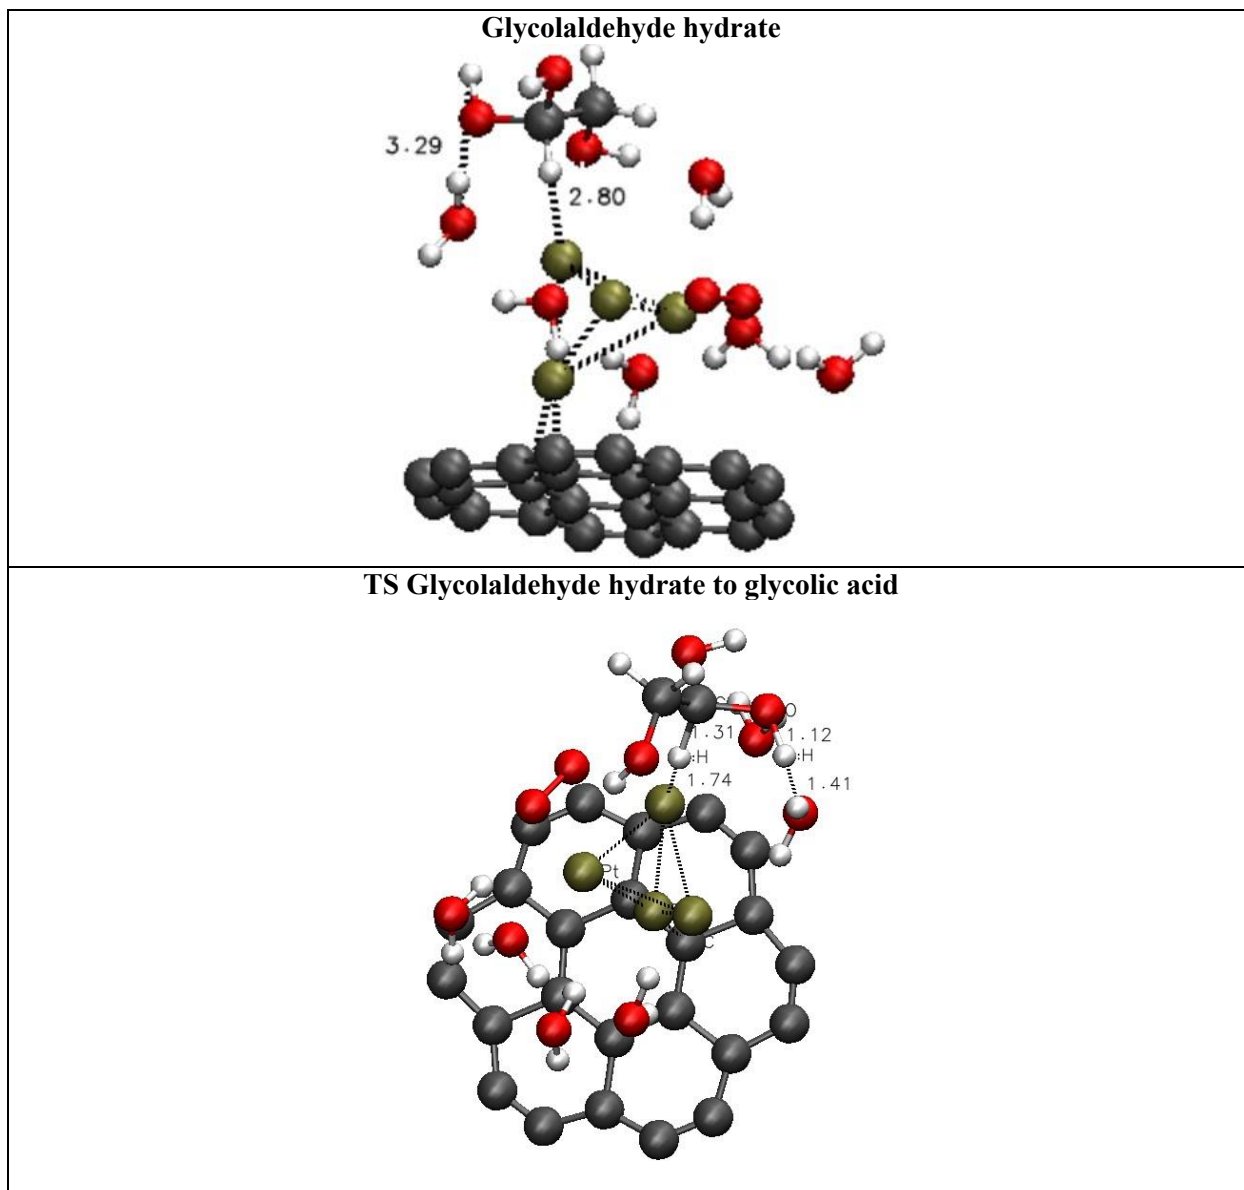

**Figure S10.** Molecular structures corresponding to the FESs of **Figure 4** in the main text.

**TS Glycolic acid to Glyoxylic acid**

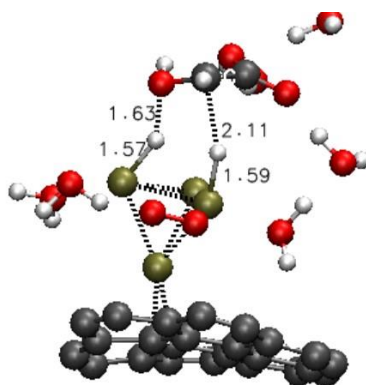

**Glyoxylic acid**

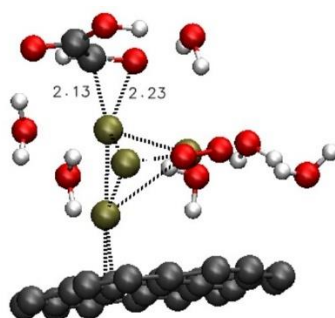

**Figure S11.** Molecular structures corresponding to the FESs of **Figure 5** in the main text.

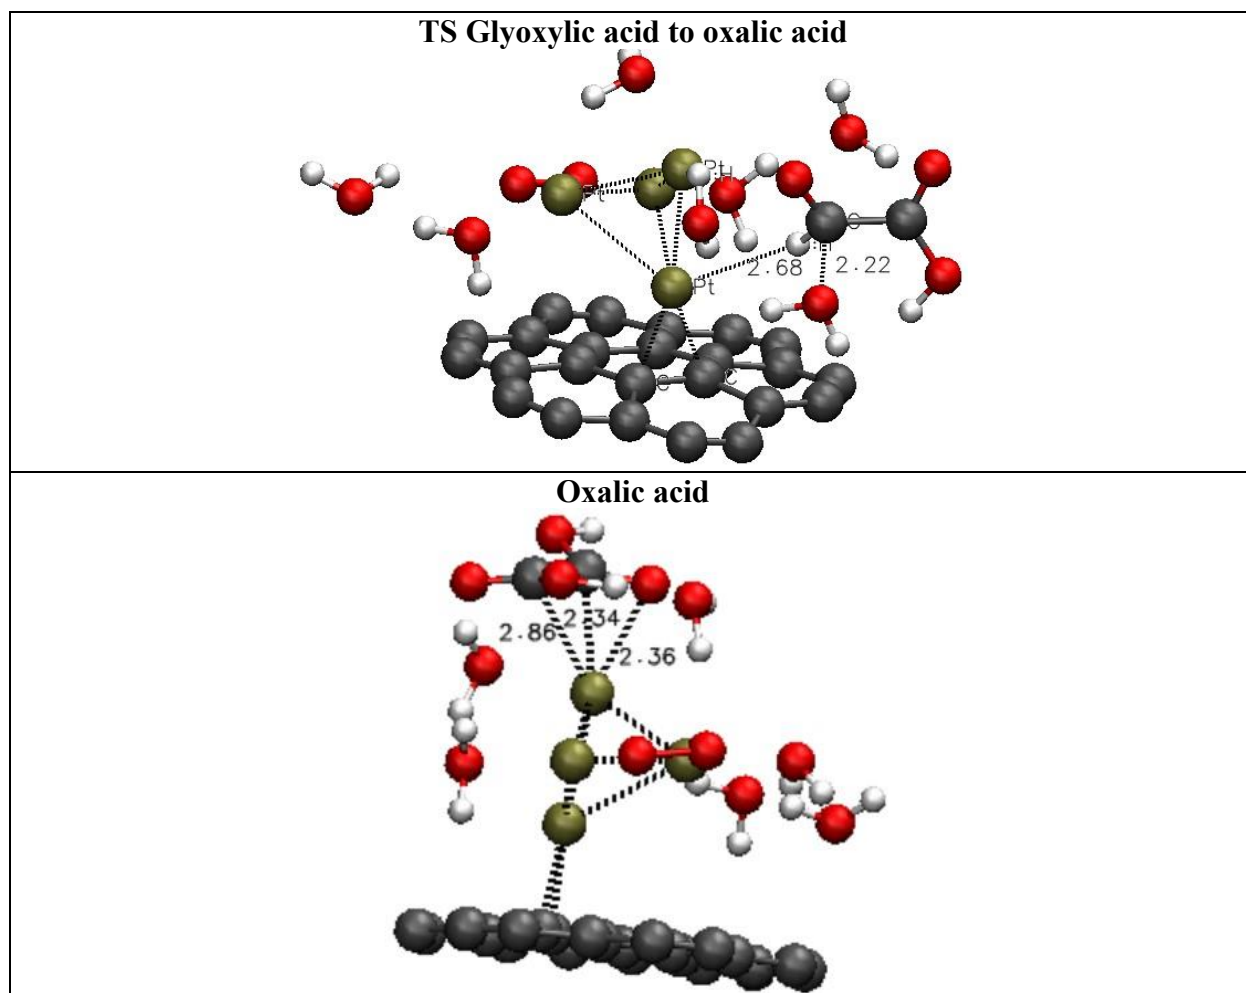

**Figure S12.** Molecular structures corresponding to the FESs of **Figure 7A** in the main text.

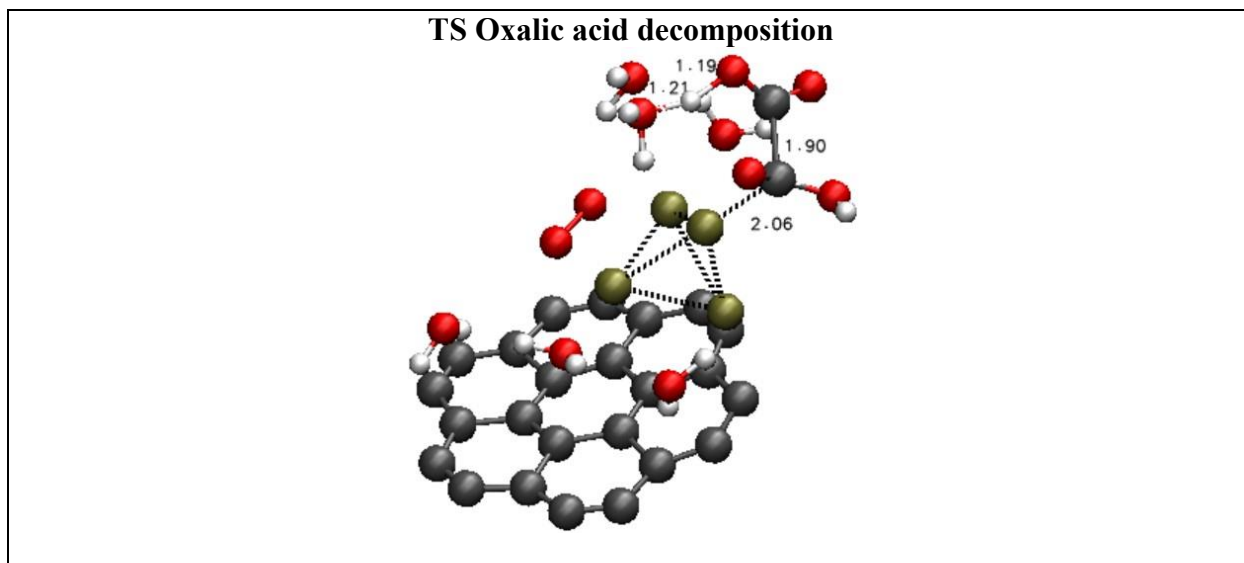

**Figure S13.** Molecular structures corresponding to the FESs of **Figure 7B** in the main text.

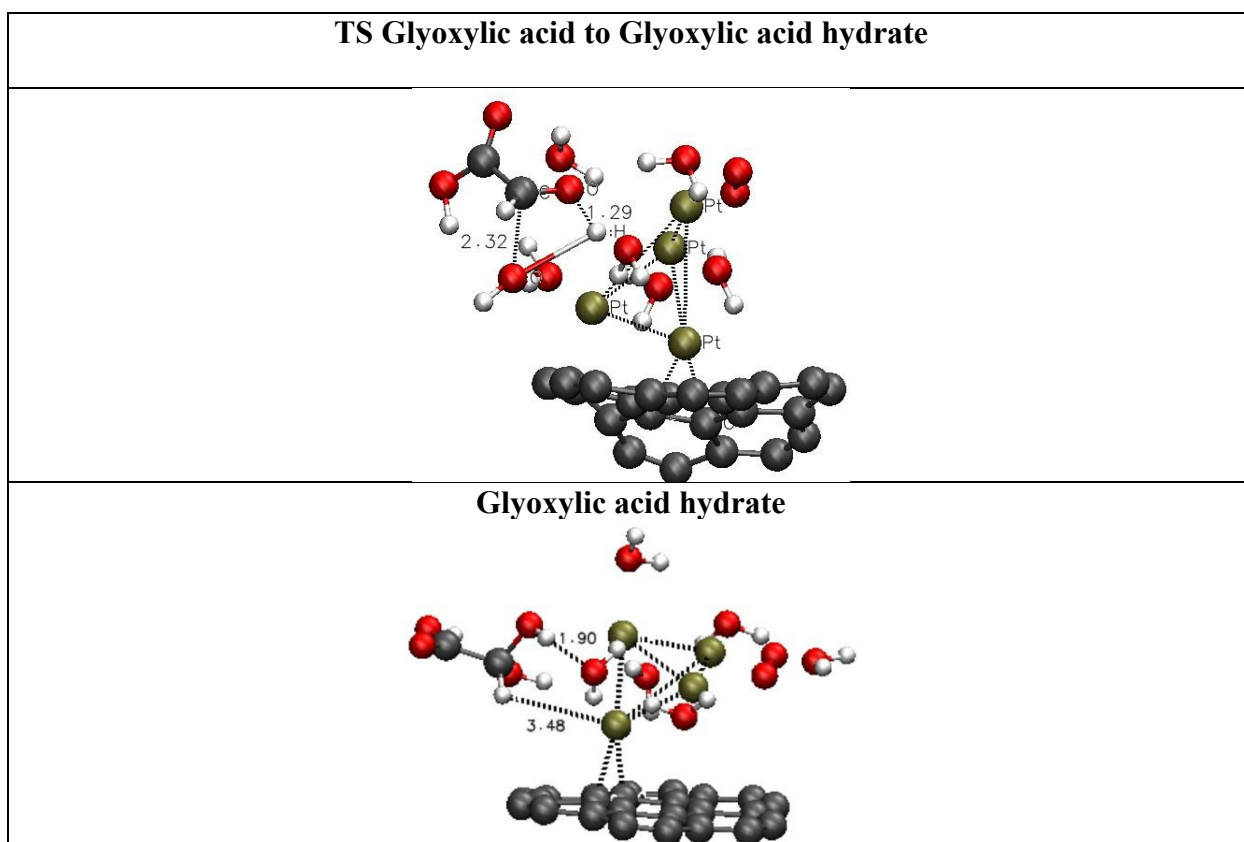

**Figure S14.** Molecular structures corresponding to the FESs of **Figure 8A** in the main text.

TS Glyoxylic acid hydrate to oxalic acid

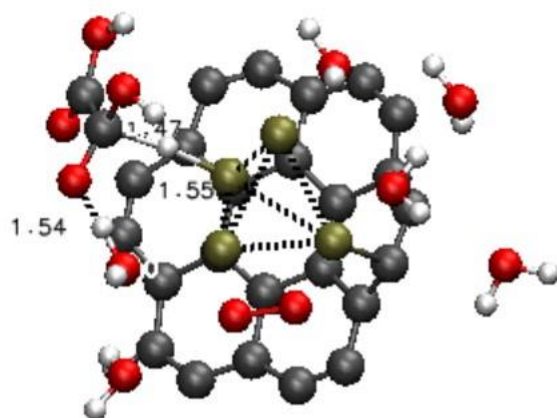

**Figure S15.** Molecular structures corresponding to the FESs of **Figure 8B** in the main text.

O2 to H2O2 (reactant state)

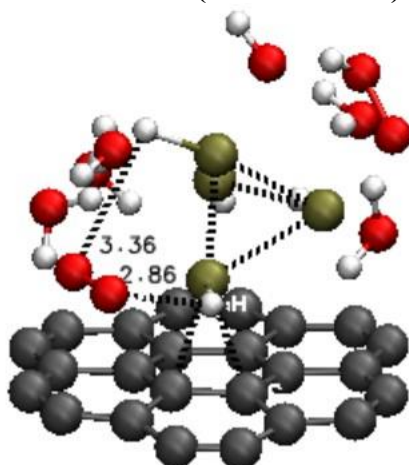

TS O2 to H2O2

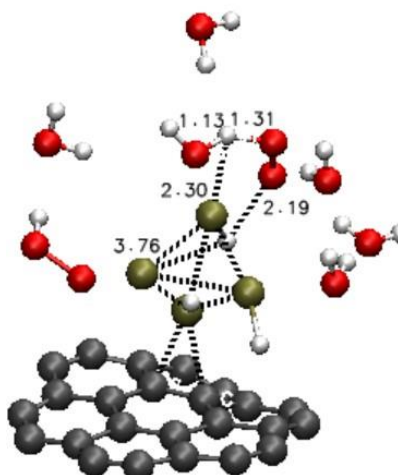

O2 to H2O2 (product state)

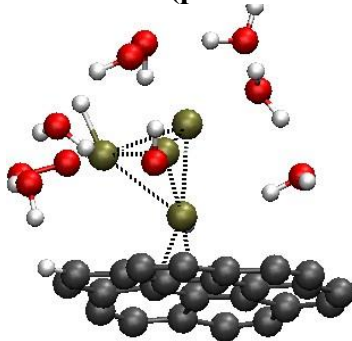

**Figure S16.** Molecular structures corresponding to the FESs of **Figure 13A** in the main text.

### Glycolaldehyde to glycolic acid – 12 explicit water molecules

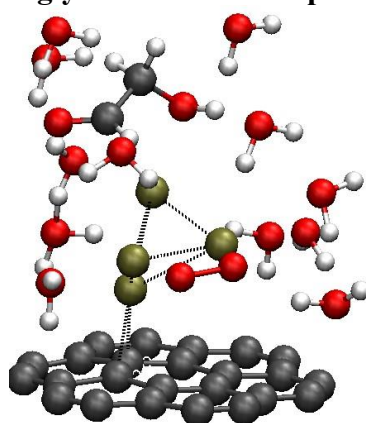

### GLA oxidation - 12 explicit water molecules

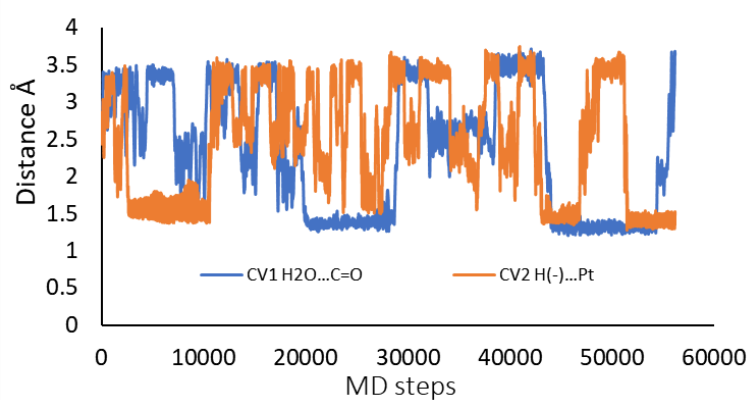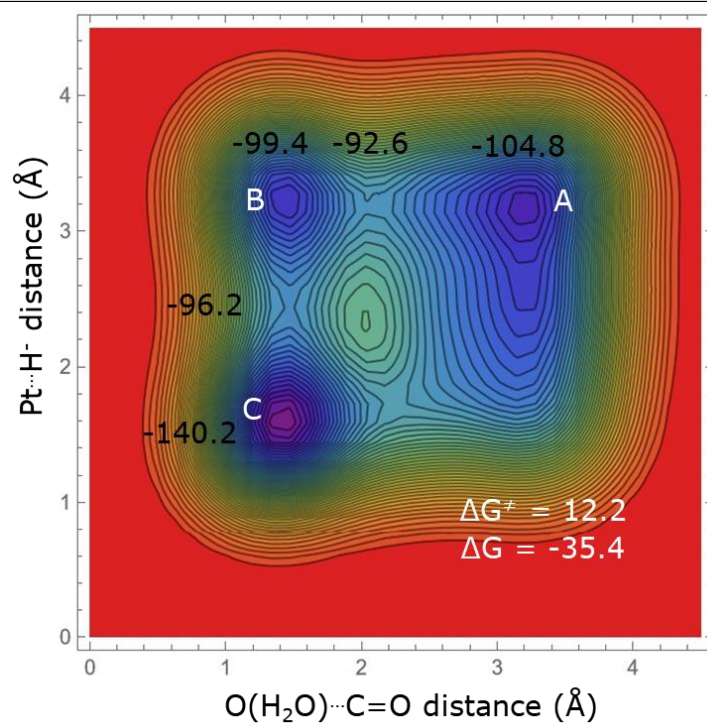

**Figure S17.** Glycolaldehyde oxidation to glycolic acid including 12 explicit water molecules.

Glycolaldehyde hydrate to glycolic acid – 12 explicit water molecules

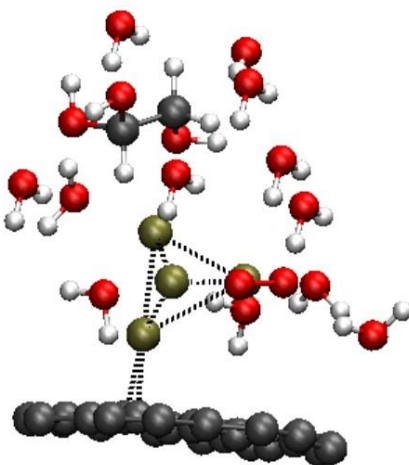

Hydrate path via H<sub>2</sub>O - 12 explicit water molecules

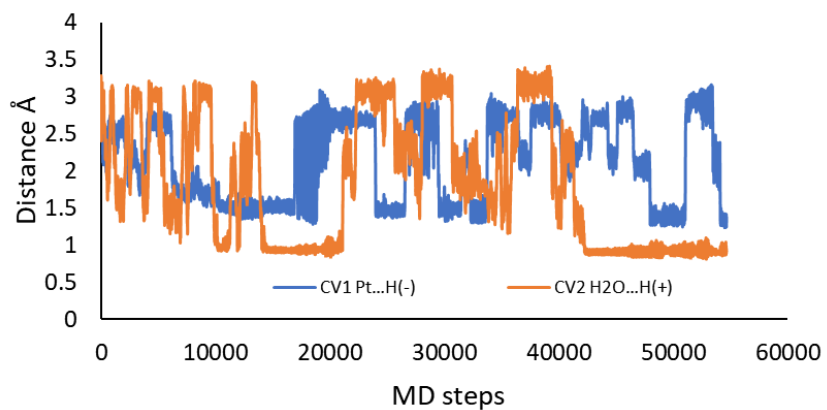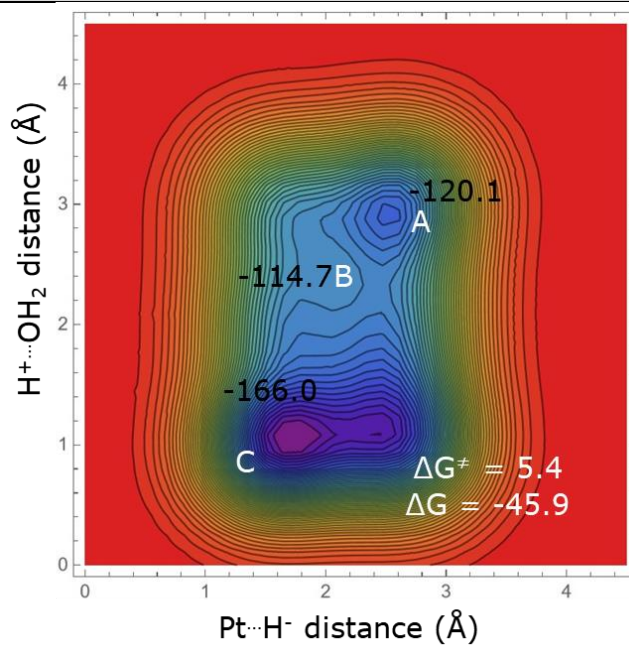

Figure S18. Glycolaldehyde hydrate oxidation to glycolic acid including 12 explicit water molecules.

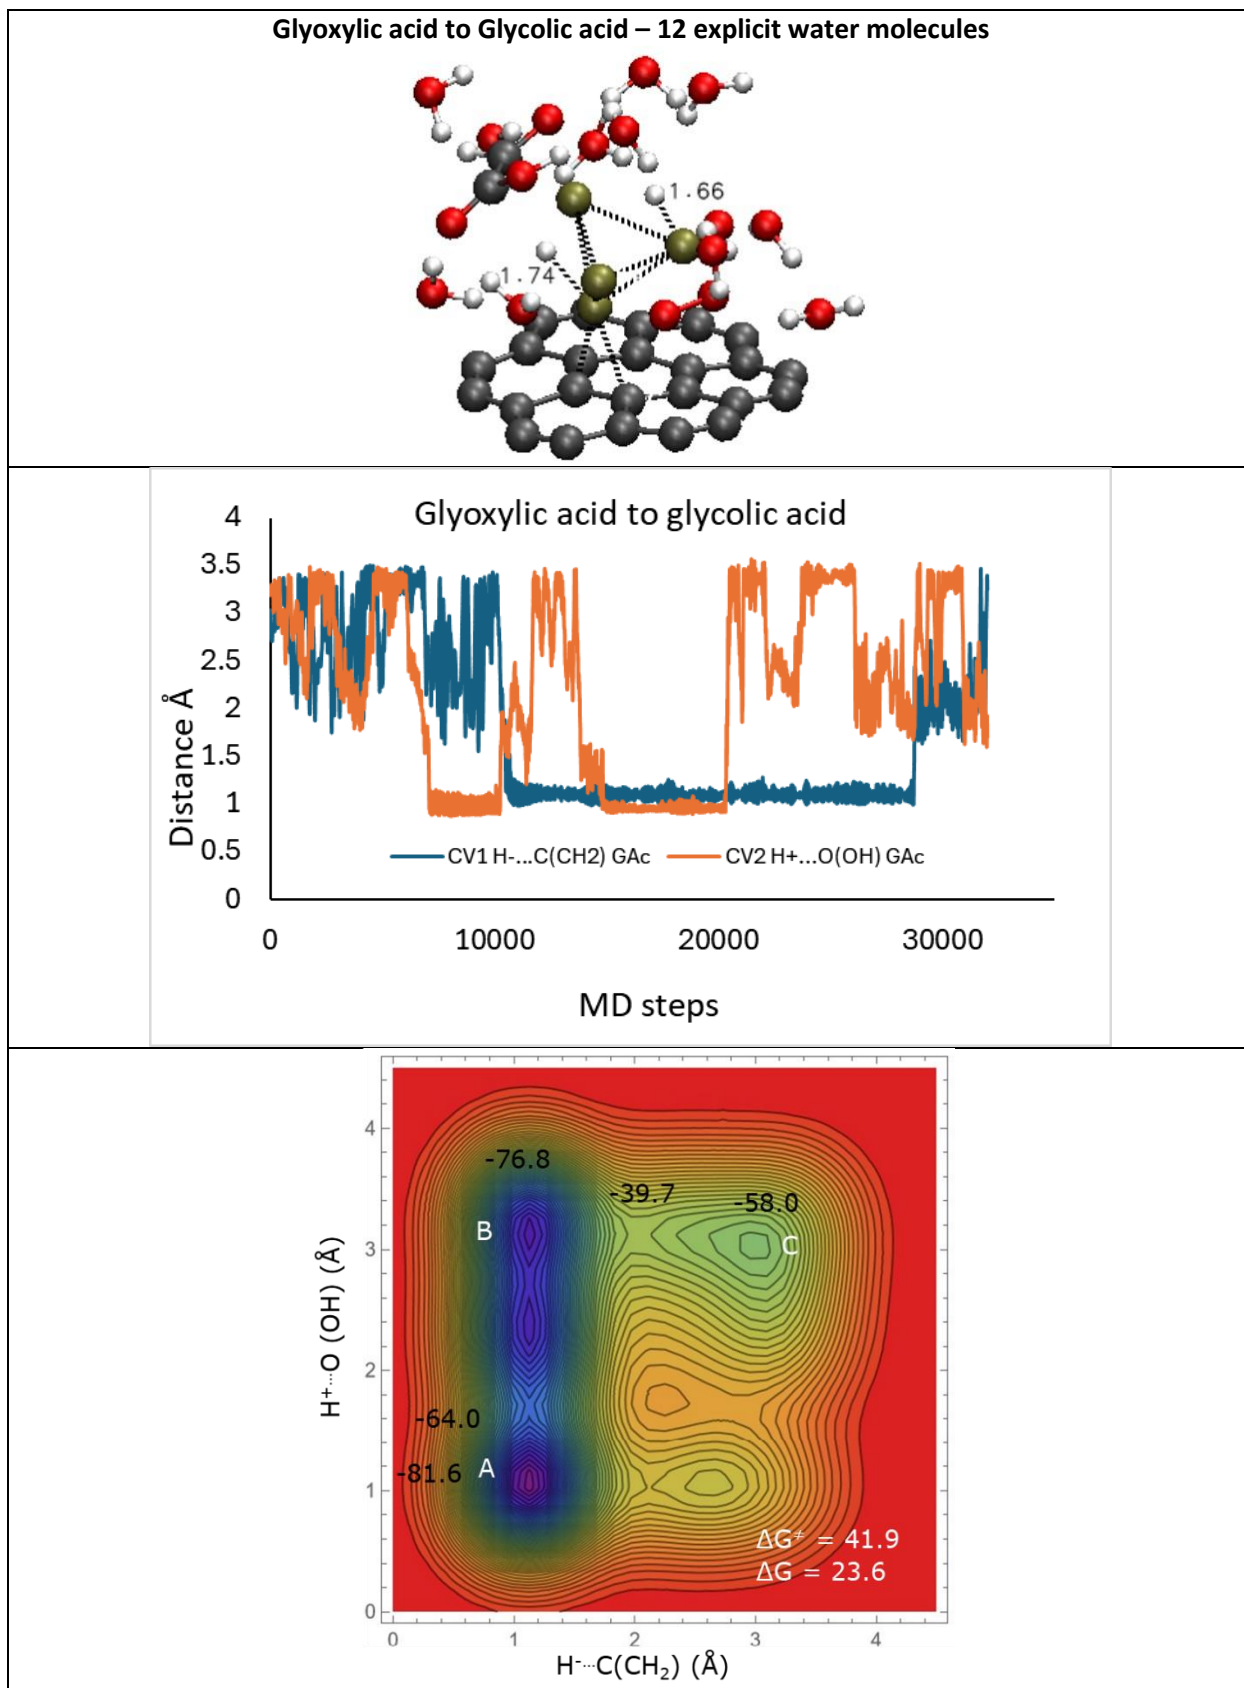

**Figure S19.** Glyoxylic oxidation to glycolic acid including 12 explicit water molecules.

## References

1. G. te Velde, F. M. Bickelhaupt, E. J. Baerends, C. F. Guerra, S. J. A. van Gisbergen, J. G. Sijders, T. Ziegler, *Chemistry with ADF. J. Comput. Chem.* 2001, 22, 931– 967, DOI: 10.1002/jcc.1056,
2. E. J. Baerends, T. Ziegler, *ADF 2021, Theoretical Chemistry*; Vrije Universiteit Amsterdam: The Netherlands, 2021.

## Cartesian coordinates of the optimized molecular structures

|                               |               |               |               |                                                   |               |               |               |
|-------------------------------|---------------|---------------|---------------|---------------------------------------------------|---------------|---------------|---------------|
| <b>Glycolaldehyde monomer</b> |               |               |               | H                                                 | 2.9821664027  | -2.4626167315 | -6.1013071736 |
| C                             | -1.7223376948 | 0.9846066683  | 1.2571077223  | H                                                 | 2.2953002330  | -1.1574411893 | -5.6682597206 |
| C                             | -0.8882797368 | -0.1091128434 | 1.3138746586  | O                                                 | 3.9474958627  | -1.8130922588 | -3.7234181677 |
| C                             | -0.8946360475 | -1.3931597507 | 1.8243313158  | H                                                 | 4.7575312476  | -1.2782608664 | -3.5029763435 |
| C                             | -1.5097209709 | 2.1157015120  | 0.7693937363  | H                                                 | 3.6820342693  | -2.4018612669 | -2.9542445524 |
| C                             | -0.3703701449 | 2.5939262036  | 0.1630799588  | O                                                 | -2.3937770433 | -1.6195329126 | -3.3721881300 |
| C                             | 0.7302203329  | 1.5365936282  | 0.1012068218  | H                                                 | -2.4640878311 | -1.0824171006 | -2.5587517684 |
| C                             | 0.4758239598  | 0.1955577135  | 0.6685561158  | H                                                 | -2.7236392755 | -1.0308519206 | -4.1021123559 |
| C                             | 0.0280889747  | -2.2292895077 | 1.8613555040  | O                                                 | 5.7523072950  | 0.2504858423  | -3.5815934556 |
| C                             | 1.3406555483  | -2.0882609336 | 1.4354785749  | H                                                 | 6.3644000756  | 0.3010095100  | -4.3350351613 |
| C                             | 1.5965215823  | -0.7470723921 | 0.8199323072  | H                                                 | 5.0396943923  | 0.8999730044  | -3.7902481284 |
| C                             | 0.0662949180  | 3.7849088836  | -0.4055290862 | O                                                 | 2.2946965007  | 2.3704191147  | -4.3398416881 |
| C                             | 1.2009464745  | 4.0404241956  | -0.8562499220 | O                                                 | 3.2690133894  | 1.3437442770  | -4.4152238862 |
| C                             | 2.3400500050  | 3.2458262468  | -0.9052319074 | O                                                 | 2.5087001672  | -3.2510136938 | -2.0055644345 |
| C                             | 2.0913445280  | 1.8981270264  | -0.3118301238 | H                                                 | 2.5921386136  | -3.1605086343 | -1.0368515134 |
| C                             | 3.1671126155  | 0.9431145905  | -0.1875883727 | H                                                 | 1.7335251570  | -2.6854836070 | -2.2418141759 |
| C                             | 2.9272454445  | -0.3709171606 | 0.3913687620  | O                                                 | -2.4002308417 | -0.0599181993 | -5.6312789793 |
| C                             | 2.4935738625  | -2.8593855340 | 1.4552295962  | C                                                 | -1.2903991469 | -0.5341107962 | -5.9308245423 |
| C                             | 3.6364461629  | -2.5604595785 | 1.0584725504  | C                                                 | -1.1151595041 | -2.0150196896 | -6.2790311874 |
| C                             | 4.0514804841  | -1.3539462061 | 0.5053957408  | O                                                 | -0.0778390535 | -2.6110324248 | -5.4653005537 |
| C                             | 3.6448085368  | 3.3870507579  | -1.3404096682 | H                                                 | -0.8691284172 | -2.1265462492 | -7.3502599506 |
| C                             | 4.5714344678  | 2.5602235635  | -1.2603269523 | H                                                 | -2.0509418424 | -2.5500825620 | -6.0664911913 |
| C                             | 4.5330837561  | 1.2954479499  | -0.6987340177 | H                                                 | 0.8328285243  | -2.4257289309 | -5.8856444433 |
| C                             | 5.4296314042  | 0.2617455551  | -0.5030323779 | H                                                 | -0.4132516503 | 0.1212149442  | -6.1097694254 |
| C                             | 5.2455611266  | -0.8616773312 | -0.0016706619 | <b>TS Glycolaldehyde monomer to Glycolic acid</b> |               |               |               |
| Pt                            | 0.2047910181  | 0.0125191704  | -1.4732636003 | C                                                 | 2.22536400    | 2.10017600    | 1.30848700    |
| Pt                            | -0.0698063626 | -1.2657933704 | -3.6342671188 | C                                                 | 3.26741400    | 1.42240100    | 0.68848600    |
| Pt                            | 2.3087047446  | -0.2942408154 | -3.6326080023 | C                                                 | 4.38875200    | 0.71966300    | 1.14304700    |
| Pt                            | 0.6736252095  | 1.4836271126  | -3.5661489555 | C                                                 | 1.34039900    | 2.80621800    | 0.76984300    |
| O                             | -0.7789722174 | 3.2896190643  | -3.4163053344 | C                                                 | 1.06790600    | 3.06990700    | -0.55716700   |
| H                             | -0.5071840865 | 3.9732161940  | -4.0555433720 | C                                                 | 2.03609200    | 2.31391300    | -1.34945900   |
| H                             | -0.5361172691 | 3.6502804243  | -2.5325477854 | C                                                 | 3.22952100    | 1.65840700    | -0.76402200   |
| O                             | 2.2617760036  | -1.8684768419 | -6.3828973347 | C                                                 | 5.45144700    | 0.54762500    | 0.48888400    |

|    |             |             |             |
|----|-------------|-------------|-------------|
| C  | 5.63303900  | 0.84207000  | -0.89063400 |
| C  | 4.42282200  | 1.39609300  | -1.61698500 |
| C  | 0.10489900  | 3.78651100  | -1.20762300 |
| C  | -0.13985000 | 3.75549300  | -2.53217400 |
| C  | 0.89441800  | 3.21435500  | -3.46502100 |
| C  | 2.08732800  | 2.60732400  | -2.81708400 |
| C  | 3.23508800  | 2.25740400  | -3.66902200 |
| C  | 4.41603800  | 1.70748600  | -3.00802200 |
| C  | 6.67462400  | 0.75741700  | -1.75109200 |
| C  | 6.68704100  | 0.92291800  | -2.98706800 |
| C  | 5.67584800  | 1.42412400  | -3.78056800 |
| C  | 1.02489000  | 3.23783800  | -4.81114400 |
| C  | 2.00571800  | 2.99093700  | -5.55265800 |
| C  | 3.21905000  | 2.49283100  | -5.11101600 |
| C  | 4.49915700  | 2.23864800  | -5.65749700 |
| C  | 5.49721800  | 1.68807900  | -5.16762900 |
| Pt | 1.89381500  | 0.11403700  | -1.69800400 |
| Pt | 0.46758100  | -1.88368900 | -2.29145200 |
| Pt | 0.10298300  | -0.50151500 | -4.58551100 |
| Pt | -0.59070900 | 0.51347200  | -2.42221600 |
| O  | -1.23046800 | 0.93642400  | -0.52268700 |
| H  | -0.72101900 | 0.14866000  | 0.02213000  |
| H  | -2.14850800 | 0.68997800  | -0.45499600 |
| O  | -3.58240300 | -0.33190500 | -0.27670300 |
| H  | -4.06390700 | -0.55929100 | -1.07972600 |
| H  | -3.07988400 | -1.07990100 | 0.05232400  |
| O  | 1.95931200  | -0.61679400 | -5.24413800 |
| H  | -0.80524800 | 4.56178400  | -3.03025600 |
| H  | 2.72249200  | -1.03098300 | -4.77616200 |
| O  | 0.32673100  | -0.58782000 | 0.93624500  |
| H  | 1.02382300  | -0.59264800 | 0.22420100  |
| H  | 0.54178300  | -0.02317500 | 1.74595100  |
| O  | 3.93553800  | -1.41358300 | -3.40621400 |
| H  | 3.16556500  | -2.02103600 | -3.16066700 |
| H  | 4.79190800  | -1.88935600 | -3.26642000 |
| O  | -2.32621400 | 0.26301600  | -3.40645700 |
| O  | -1.90934300 | -0.45745300 | -4.57984900 |
| O  | 1.70627000  | 0.58220600  | -8.04979300 |
| H  | 2.20682000  | 0.18394000  | -8.74148700 |
| H  | 1.80034900  | -0.00809600 | -7.22133400 |
| O  | -0.85617300 | -3.13367300 | -0.27736600 |

|   |            |             |             |
|---|------------|-------------|-------------|
| C | 0.32835300 | -2.82104300 | -0.59656400 |
| C | 1.51650400 | -3.17335900 | 0.30974600  |
| O | 2.75684600 | -2.72587300 | -0.12462100 |
| H | 1.62303800 | -4.26184400 | 0.62673300  |
| H | 1.08534700 | -2.77536800 | 1.22625000  |
| H | 2.53910300 | -1.81696200 | -0.59188400 |
| H | 1.83666100 | -3.49137800 | -2.77133800 |

**Glycolaldehyde hydrate**

i = 231, E = -814.1471323051

|    |               |               |               |
|----|---------------|---------------|---------------|
| C  | -1.3594842067 | 1.3080072000  | 1.0781406775  |
| C  | -0.6189444554 | 0.1623636894  | 1.2519099991  |
| C  | -0.7253152831 | -1.0568798511 | 1.8937271100  |
| C  | -1.0567518790 | 2.3690211880  | 0.4874423881  |
| C  | 0.1189752607  | 2.6966976359  | -0.1475268304 |
| C  | 1.1339375040  | 1.5494742348  | -0.0941744576 |
| C  | 0.7759413712  | 0.2965777633  | 0.6057703615  |
| C  | 0.1362095620  | -1.9441907775 | 2.0465061960  |
| C  | 1.4676285659  | -1.9319864436 | 1.6547766386  |
| C  | 1.8297590244  | -0.6883012288 | 0.9045344374  |
| C  | 0.6452332093  | 3.7857543703  | -0.8344826790 |
| C  | 1.7989559042  | 3.8922042290  | -1.2990726905 |
| C  | 2.8796534882  | 3.0228915810  | -1.2374952586 |
| C  | 2.5273379230  | 1.7715517793  | -0.5039507684 |
| C  | 3.5359313852  | 0.7754066945  | -0.2302581891 |
| C  | 3.1941935051  | -0.4441833302 | 0.4877101251  |
| C  | 2.5667290125  | -2.7657156485 | 1.8019782383  |
| C  | 3.7391492987  | -2.5858692888 | 1.4181799012  |
| C  | 4.2487197657  | -1.4755238311 | 0.7547670529  |
| C  | 4.2003627941  | 3.0287721629  | -1.6463201740 |
| C  | 5.0716327465  | 2.1659676995  | -1.4329993296 |
| C  | 4.9362021114  | 0.9832910209  | -0.7265139466 |
| C  | 5.7623445788  | -0.0710498754 | -0.3791639181 |
| C  | 5.4863243226  | -1.1120827074 | 0.2434814937  |
| Pt | 0.5128090708  | -0.0628395976 | -1.4985696197 |
| Pt | -0.0983113576 | -1.2281158148 | -3.6586635384 |
| Pt | 2.3940062620  | -0.4893731766 | -3.6039293529 |
| Pt | 0.8353005734  | 1.3373617465  | -3.7497378491 |
| O  | -0.5225081381 | 3.2471836852  | -3.6585932712 |
| H  | -0.0791290224 | 3.6712934467  | -2.8856271137 |
| H  | -1.3644697903 | 2.9214851057  | -3.2906290447 |
| O  | 2.1724348875  | -2.5546192141 | -6.0602184044 |

|                                                   |               |               |               |    |             |             |             |
|---------------------------------------------------|---------------|---------------|---------------|----|-------------|-------------|-------------|
| H                                                 | 2.6558642252  | -3.2939844040 | -5.6511710347 | C  | 3.82054500  | 1.31944600  | -4.82119900 |
| H                                                 | 2.3113454547  | -1.8103344879 | -5.3943022692 | C  | 5.07128700  | 0.85452200  | -4.31063900 |
| O                                                 | 3.9866260394  | -2.0349664372 | -3.4414698498 | C  | 5.42699100  | 0.95463700  | -2.89609800 |
| H                                                 | 4.8091911078  | -1.4955560952 | -3.2911930451 | C  | 6.10427300  | 1.09029200  | -0.25996100 |
| H                                                 | 3.7012945978  | -2.5180017381 | -2.6095975366 | C  | 6.80264900  | 0.40489700  | -1.03101100 |
| O                                                 | -2.2898362788 | -1.8249694983 | -3.5030871060 | C  | 6.69759200  | 0.29523600  | -2.39146600 |
| H                                                 | -2.6463021776 | -1.2713728467 | -2.7854657365 | C  | 4.33975600  | 0.36248700  | -6.91075400 |
| H                                                 | -2.6396189750 | -1.4438142563 | -4.3594408012 | C  | 5.44730400  | -0.05951600 | -6.55497500 |
| O                                                 | 5.8463532090  | -0.0350368471 | -3.6532173275 | C  | 5.99846800  | 0.06200800  | -5.30562100 |
| H                                                 | 6.3290202408  | -0.1725017558 | -4.4856596218 | C  | 7.11548900  | -0.35577600 | -4.62214200 |
| H                                                 | 5.1227529304  | 0.5942912764  | -3.8948325036 | C  | 7.39367200  | -0.30427100 | -3.38716300 |
| O                                                 | 2.4692507079  | 2.0647218820  | -4.6544500733 | Pt | 1.96274500  | 0.60636000  | -2.53591800 |
| O                                                 | 3.4089130153  | 1.0002500816  | -4.6235892684 | Pt | 0.69569000  | -0.85081900 | -0.89686000 |
| O                                                 | 2.4871825077  | -3.2509392253 | -1.6223543295 | Pt | 0.46021200  | -1.70629300 | -3.21052500 |
| H                                                 | 1.7598718326  | -2.6132991705 | -1.8172862699 | Pt | -0.61334700 | 0.46417100  | -2.81784800 |
| H                                                 | 2.6090937896  | -3.1971841411 | -0.6553654954 | O  | -1.72261900 | 2.63583200  | -2.18769600 |
| O                                                 | -1.8712403889 | 0.5956311556  | -7.6175312315 | H  | -1.97932300 | 3.17451300  | -3.06841100 |
| C                                                 | -1.6134888400 | -0.1632766591 | -6.4567468037 | H  | -2.54424000 | 2.42549600  | -1.76745600 |
| C                                                 | -0.6282057336 | -1.2488439217 | -6.8733538699 | O  | 2.29584600  | -3.04279700 | -0.60705000 |
| O                                                 | -0.4180625821 | -2.1847808502 | -5.7951454660 | H  | 1.29407700  | -2.89468800 | -0.53647200 |
| H                                                 | 0.3179996411  | -0.7599855914 | -7.1554540469 | H  | 2.59515400  | -2.11731300 | -0.74717000 |
| H                                                 | -1.0244421719 | -1.7837680582 | -7.7535779849 | O  | 1.61472800  | -3.56642200 | -3.56128700 |
| H                                                 | 0.5289401019  | -2.5240988907 | -5.9113582254 | H  | 2.21233100  | -3.26407500 | -4.27983200 |
| O                                                 | -2.8481553470 | -0.7033619001 | -5.9127787645 | H  | 2.12654600  | -3.52948200 | -2.74460700 |
| H                                                 | -1.1916055698 | 0.4308652127  | -5.6264293763 | O  | -2.68165300 | -0.63617200 | 0.88621800  |
| H                                                 | -3.2416476863 | -1.2758777176 | -6.5996217376 | H  | -1.76262300 | -1.01438900 | 0.84403000  |
| H                                                 | -2.3247435429 | 1.4142773687  | -7.3488084373 | H  | -3.23985800 | -1.38350900 | 1.15610200  |
| <b>TS Glycolaldehyde hydrate to Glycolic acid</b> |               |               |               |    |             |             |             |
| C                                                 | 1.48940900    | 3.75568700    | -2.25200000   | O  | 2.58564700  | -2.22189700 | -5.73454100 |
| C                                                 | 2.55865800    | 3.25466200    | -1.55900900   | H  | 3.54207500  | -2.05875300 | -5.56538600 |
| C                                                 | 3.10353700    | 3.14689200    | -0.27474200   | H  | 2.17626200  | -1.35107000 | -5.62953600 |
| C                                                 | 1.15611600    | 3.70032300    | -3.45085400   | O  | -0.56369400 | 0.12424500  | -4.98740100 |
| C                                                 | 1.88505600    | 3.04990400    | -4.46564900   | O  | -0.06405600 | -1.17480100 | -5.00329600 |
| C                                                 | 2.88871300    | 2.05907300    | -3.86182200   | O  | 4.10831600  | -1.96730700 | -2.86342200 |
| C                                                 | 3.29518700    | 2.22707600    | -2.44193100   | H  | 4.99903700  | -1.51854600 | -2.83013800 |
| C                                                 | 4.11226300    | 2.59820300    | 0.20155100    | H  | 3.56432100  | -1.17012600 | -3.00721400 |
| C                                                 | 4.94711900    | 1.79215200    | -0.55444300   | O  | -3.95105500 | 0.88898000  | -3.33353700 |
| C                                                 | 4.54594300    | 1.62741700    | -2.00404500   | C  | -3.50355700 | -0.03472200 | -2.39302300 |
| C                                                 | 1.76645100    | 2.80273900    | -5.81956700   | C  | -4.10231500 | -1.38850400 | -2.56422800 |
| C                                                 | 2.45467000    | 2.07420000    | -6.56346400   | O  | -3.20472800 | -2.48231100 | -2.13689200 |
| C                                                 | 3.48216200    | 1.22034100    | -6.22008700   | H  | -4.42709100 | -1.52640600 | -3.64955700 |
|                                                   |               |               |               | H  | -5.02303000 | -1.46582700 | -1.94056400 |

|   |             |             |             |   |               |               |               |
|---|-------------|-------------|-------------|---|---------------|---------------|---------------|
| H | -2.35738900 | -2.48930900 | -2.61211400 | O | 4.0673466373  | -1.8790187633 | -3.4267550807 |
| O | -3.79481600 | 0.55890800  | -1.04639500 | H | 4.8629785811  | -1.2973830446 | -3.2945484588 |
| H | -2.19549600 | -0.15487500 | -2.44481500 | H | 3.8501355801  | -2.3812861222 | -2.5861133673 |
| H | -3.30651900 | 0.07471100  | -0.16406800 | O | -2.3864120458 | -1.4725272632 | -3.0723933664 |
| H | -4.39442200 | 1.45449700  | -2.64697800 | H | -2.4273576327 | -0.8544019511 | -2.3174686449 |

**Glycolic acid**

i = 234, E = -812.9674610383

|    |               |               |               |
|----|---------------|---------------|---------------|
| C  | -1.3490148808 | 1.3274654857  | 1.3127432976  |
| C  | -0.5017682369 | 0.2586531148  | 1.4919362466  |
| C  | -0.4768835767 | -0.9442969705 | 2.1715503953  |
| C  | -1.1618059457 | 2.3886220861  | 0.6774251279  |
| C  | -0.0482338267 | 2.7944959191  | -0.0190330020 |
| C  | 1.0636845084  | 1.7419744398  | 0.0250915663  |
| C  | 0.8454286436  | 0.4870361733  | 0.7775873676  |
| C  | 0.4602606643  | -1.7543054810 | 2.3036193223  |
| C  | 1.7632541417  | -1.6538000624 | 1.8371298935  |
| C  | 1.9859978347  | -0.4061527592 | 1.0402194675  |
| C  | 0.3562292574  | 3.8988655807  | -0.7592790927 |
| C  | 1.4765838263  | 4.0960150396  | -1.2717885840 |
| C  | 2.6269087247  | 3.3181715981  | -1.2386996516 |
| C  | 2.4125314609  | 2.0627731766  | -0.4596345614 |
| C  | 3.5092933479  | 1.1553863512  | -0.2159224308 |
| C  | 3.3027605629  | -0.0701174956 | 0.5428063155  |
| C  | 2.9284462192  | -2.3995612556 | 1.9391222872  |
| C  | 4.0593885957  | -2.1402316719 | 1.4840524248  |
| C  | 4.4466306295  | -1.0107421923 | 0.7717708485  |
| C  | 3.9229716369  | 3.4208207695  | -1.7096058431 |
| C  | 4.8670644167  | 2.6316921134  | -1.5232929898 |
| C  | 4.8622370315  | 1.4592995741  | -0.7876437169 |
| C  | 5.7825250006  | 0.4797038075  | -0.4636260136 |
| C  | 5.6252506911  | -0.5674171402 | 0.1889159561  |
| Pt | 0.5145840027  | 0.0373201877  | -1.3069907928 |
| Pt | -0.0501869100 | -1.3335043908 | -3.3440561013 |
| Pt | 2.3813495821  | -0.4420826855 | -3.5062896786 |
| Pt | 0.7184768468  | 1.3025308718  | -3.6104403626 |
| O  | -0.7673149714 | 3.0956156937  | -3.5795632620 |
| H  | -0.6206732506 | 3.6622272851  | -4.3583908209 |
| H  | -0.4194106805 | 3.6023261332  | -2.8103620109 |
| O  | 1.6151138238  | -1.2519411880 | -6.4415151383 |
| H  | 2.4185084411  | -1.3696438645 | -6.9768862397 |
| H  | 1.9378038800  | -0.9345243660 | -5.5148098582 |

|   |               |               |               |
|---|---------------|---------------|---------------|
| O | 5.8255973632  | 0.2346880073  | -3.5909011884 |
| H | 6.4130683561  | 0.2083090100  | -4.3644420911 |
| H | 5.0825137038  | 0.8294658033  | -3.8540418228 |
| O | 2.3124582264  | 2.1366986557  | -4.4991567719 |
| O | 3.3113457093  | 1.1226803796  | -4.4870823148 |
| O | 2.7461372523  | -3.1131463213 | -1.4628631642 |
| H | 2.9063026567  | -2.9458434162 | -0.5147198016 |
| H | 1.9626716728  | -2.5572539130 | -1.6853058751 |
| O | -2.7592793840 | -0.3100947015 | -5.6059699241 |
| C | -1.7019794300 | -0.7713152924 | -6.0349604196 |
| C | -1.4330447699 | -2.2865635447 | -6.0179164866 |
| O | -0.2829148473 | -2.6765964149 | -5.2374864509 |
| H | -1.3257574446 | -2.6496922532 | -7.0546915448 |
| H | -2.3030144590 | -2.7694274384 | -5.5561579348 |
| H | 0.5380197915  | -2.4257229412 | -5.7437093023 |
| O | -0.7860662037 | 0.0295068507  | -6.6024298696 |
| H | 0.0982630701  | -0.4239023450 | -6.7121798805 |

**TS Glycolic acid to Glyoxylic acid**

|   |            |            |             |
|---|------------|------------|-------------|
| C | 4.05355100 | 3.48800900 | 0.94150100  |
| C | 4.68320000 | 3.27363300 | -0.24659300 |
| C | 5.90743000 | 2.81328400 | -0.68740000 |
| C | 2.99892800 | 4.12522200 | 1.23094100  |
| C | 2.12355100 | 4.67491000 | 0.26546200  |
| C | 2.40847700 | 4.16426100 | -1.11657400 |
| C | 3.78851200 | 3.63020400 | -1.39142500 |
| C | 6.33399700 | 2.65624400 | -1.85143300 |
| C | 5.66572300 | 3.04877500 | -3.00110200 |
| C | 4.26670700 | 3.51476900 | -2.73552200 |
| C | 1.03241000 | 5.56875200 | 0.28266200  |
| C | 0.26198600 | 5.83532900 | -0.66970600 |
| C | 0.33183700 | 5.42872000 | -1.97274000 |
| C | 1.61859200 | 4.61995200 | -2.26611800 |
| C | 2.08690500 | 4.35172400 | -3.63487000 |
| C | 3.39576100 | 3.84030900 | -3.88626600 |
| C | 5.88356600 | 2.90514600 | -4.34551000 |

|                       |             |             |             |     |               |                             |
|-----------------------|-------------|-------------|-------------|-----|---------------|-----------------------------|
| C                     | 5.16255300  | 3.17858900  | -5.30191200 | i = | 74, E =       | -811.7672240626             |
| C                     | 3.83837900  | 3.55267000  | -5.25180600 | C   | -1.6871396542 | 0.9900335296 1.2518955085   |
| C                     | -0.45021600 | 5.44898500  | -3.19219900 | C   | -0.8490963491 | -0.0993166302 1.3440215738  |
| C                     | 0.01232800  | 5.04657400  | -4.28382900 | C   | -0.8651741759 | -1.3781246736 1.8669495288  |
| C                     | 1.20626500  | 4.51782600  | -4.75641100 | C   | -1.4717081019 | 2.1089610410 0.7405139892   |
| C                     | 1.68810000  | 4.12705200  | -6.00320600 | C   | -0.3241173940 | 2.5774260936 0.1388075870   |
| C                     | 2.87533000  | 3.81215900  | -6.23283600 | C   | 0.7793285614  | 1.5278748312 0.1235587190   |
| Pt                    | 0.83823400  | 2.69878000  | -1.61457900 | C   | 0.5174779564  | 0.1981189424 0.7082732302   |
| Pt                    | 0.79019500  | 0.23901100  | -1.11019500 | C   | 0.0550728016  | -2.2159279231 1.9102640514  |
| Pt                    | 0.73746700  | 0.87294100  | -3.64225800 | C   | 1.3656742880  | -2.0912708212 1.4771338891  |
| Pt                    | -1.30340300 | 1.30072900  | -2.00135400 | C   | 1.6292824528  | -0.7538021924 0.8535063942  |
| O                     | -2.40614300 | 2.37156200  | -0.26320700 | C   | 0.1087304796  | 3.7602911348 -0.4503404009  |
| H                     | -1.94818900 | 2.69484700  | 0.58802300  | C   | 1.2512187752  | 4.0092203255 -0.8816475858  |
| H                     | -3.33710800 | 2.73451300  | -0.17576300 | C   | 2.3953360262  | 3.2228211417 -0.8980592674  |
| O                     | -2.87119700 | 2.48616700  | -3.60006800 | C   | 2.1390660385  | 1.8808242625 -0.2938242142  |
| H                     | -1.97967100 | 2.55113900  | -4.00358800 | C   | 3.2090976016  | 0.9198597168 -0.1674478164  |
| H                     | -3.08397600 | 3.46458400  | -3.36642100 | C   | 2.9597913566  | -0.3914135801 0.4118964063  |
| O                     | 2.76683500  | 0.58407200  | -4.28987700 | C   | 2.5105808010  | -2.8738977713 1.4931911690  |
| H                     | 3.26328400  | 1.27120500  | -4.69546800 | C   | 3.6511810962  | -2.5799480221 1.0883743896  |
| H                     | 2.83123500  | -0.31319400 | -4.77948000 | C   | 4.0764978960  | -1.3838452906 0.5229901982  |
| O                     | 3.08239300  | -1.79852400 | -5.30109200 | C   | 3.7054784629  | 3.3627764303 -1.3154023143  |
| H                     | 2.16596900  | -2.11679400 | -5.07544000 | C   | 4.6274471999  | 2.5324508750 -1.2238060969  |
| H                     | 3.61276500  | -2.27915600 | -4.64657700 | C   | 4.5795704341  | 1.2638141942 -0.6730422292  |
| O                     | 0.80881800  | -3.48103400 | -0.22428900 | C   | 5.4671840714  | 0.2215655833 -0.4840315679  |
| H                     | 0.03631700  | -3.54844600 | 0.28583400  | C   | 5.2727638284  | -0.9015554004 0.0137576447  |
| H                     | 0.55309700  | -3.05860700 | -1.12188600 | Pt  | 0.2438863719  | -0.0715562990 -1.4459209900 |
| O                     | -0.86773800 | 2.33302100  | -5.55355200 | Pt  | -0.0443468887 | -1.3737273543 -3.5930746660 |
| O                     | 0.31269900  | 1.92968500  | -5.53905400 | Pt  | 2.3239752412  | -0.3423567295 -3.5276204584 |
| O                     | 1.26322100  | -5.48276400 | -2.79339600 | Pt  | 0.6668689174  | 1.4279517496 -3.5151473625  |
| H                     | 0.75208300  | -4.75939000 | -2.28503300 | O   | -0.8709718824 | 3.1693032499 -3.4152290661  |
| H                     | 1.18403600  | -5.24468100 | -3.74069500 | H   | -0.7803253008 | 3.7820981938 -4.1679240309  |
| O                     | -0.55364600 | -3.20560600 | -2.49350000 | H   | -0.5727432751 | 3.6665871554 -2.6217826387  |
| C                     | -0.20498300 | -2.75766400 | -3.67188800 | O   | 2.0063090896  | -1.0022259287 -6.8202138943 |
| C                     | -1.24243700 | -1.94996200 | -4.29619600 | H   | 1.7727857174  | -1.7867566651 -6.2635589572 |
| O                     | -2.05595600 | -1.31294500 | -3.44019300 | H   | 2.3842271923  | -0.3847523758 -6.1560518372 |
| H                     | -2.09316900 | -1.96101400 | -2.70397400 | O   | 3.9523644556  | -1.8179375816 -3.6527394228 |
| H                     | -1.48167600 | -1.61504200 | -5.36387100 | H   | 4.7828882951  | -1.3077629740 -3.4543899086 |
| O                     | 0.96142100  | -2.83051300 | -4.15808100 | H   | 3.7286069160  | -2.4566918849 -2.9149183313 |
| H                     | -1.27118100 | -0.00704500 | -2.86487200 | O   | -2.4204661732 | -1.1950089799 -3.2630822984 |
| H                     | 0.07956100  | -0.30976000 | -4.46995900 | H   | -2.3974199590 | -0.3854523117 -2.7163120999 |
| <b>Glyoxylic acid</b> |             |             |             | H   | -2.6689464191 | -0.8998063684 -4.1916946326 |

|   |               |               |               |
|---|---------------|---------------|---------------|
| O | 5.8226629930  | 0.1820561064  | -3.5663905756 |
| H | 6.4126689781  | 0.1815054872  | -4.3396239807 |
| H | 5.1332934804  | 0.8529366870  | -3.7734140243 |
| O | 2.3151367034  | 2.3174838545  | -4.2195862512 |
| O | 3.2904006516  | 1.2952930129  | -4.2742993466 |
| O | 2.5766879475  | -3.3875928867 | -1.9788403179 |
| H | 2.6055883392  | -3.2478049209 | -1.0134079094 |
| H | 1.7758184827  | -2.8936269109 | -2.2732116085 |
| O | -2.4703056804 | -0.6067733993 | -5.9131489357 |
| C | -1.3039479564 | -0.9751672842 | -6.1343388995 |
| C | -0.8231178649 | -2.2151609482 | -5.3915840196 |
| O | 0.3949459507  | -2.6693565586 | -5.3493541250 |
| H | 0.4773971725  | -0.6301491640 | -6.9351568960 |
| H | -1.6556385660 | -2.8892084573 | -5.1193826828 |
| O | -0.5084923693 | -0.3218587843 | -6.9649267965 |

**TS Glyoxylic acid to Oxalic acid**

|   |             |             |             |
|---|-------------|-------------|-------------|
| C | -0.49843738 | 0.19201611  | -5.75945085 |
| C | 0.55711495  | 0.86777140  | -5.19028541 |
| C | 1.11184751  | 2.14203061  | -5.29572629 |
| C | -0.73932993 | -1.03466643 | -5.92196103 |
| C | 0.20912343  | -2.01025950 | -5.53326421 |
| C | 1.40689860  | -1.53548842 | -4.76120181 |
| C | 1.54750692  | -0.09382607 | -4.48356842 |
| C | 2.08414624  | 2.65601862  | -4.69697716 |
| C | 3.05775380  | 1.89850985  | -4.10278138 |
| C | 2.79882103  | 0.42859663  | -3.91641662 |
| C | 0.22244087  | -3.36845791 | -5.58913185 |
| C | 1.09555782  | -4.18403808 | -5.23092471 |
| C | 2.27109826  | -3.87120477 | -4.57760000 |
| C | 2.42149263  | -2.40541533 | -4.33289811 |
| C | 3.64132080  | -1.89793599 | -3.73502924 |
| C | 3.80123311  | -0.52310625 | -3.41600392 |
| C | 4.26595819  | 2.17726110  | -3.44710218 |
| C | 5.06773311  | 1.44007778  | -2.91285554 |
| C | 5.04215496  | 0.05108622  | -2.84583157 |
| C | 3.34281801  | -4.64534674 | -4.07461932 |
| C | 4.24672366  | -4.08859961 | -3.42505939 |
| C | 4.73945806  | -2.82730614 | -3.27192449 |
| C | 5.83392671  | -2.20118117 | -2.68010374 |
| C | 5.94821298  | -0.96436144 | -2.56466182 |
| C | -3.48999378 | 0.51465842  | -2.70667353 |

|    |             |             |             |
|----|-------------|-------------|-------------|
| C  | -1.99190872 | 0.50885406  | -2.15564021 |
| Pt | 1.38338390  | 0.33227720  | -2.33373029 |
| Pt | 0.25782725  | 0.41010374  | -0.06176013 |
| Pt | 2.77452778  | -0.43228656 | 0.06747943  |
| Pt | 1.16269031  | -1.87358131 | -1.00446667 |
| O  | 0.02279939  | -3.46607573 | -2.20153818 |
| O  | 0.30755719  | 1.03006042  | 2.36098547  |
| O  | 4.62227627  | 0.85376668  | 0.37231726  |
| O  | -2.77996047 | -2.69566843 | -1.65228093 |
| O  | 6.66683171  | -0.97530583 | 1.41330853  |
| O  | 2.61091694  | -3.13036466 | -0.69526268 |
| O  | 3.69019311  | -2.32413664 | -0.03178724 |
| O  | 0.01461663  | 3.73553310  | -0.14835347 |
| O  | -4.37973865 | 0.53669533  | -1.89206719 |
| O  | -1.76870387 | 0.82963387  | -0.96051524 |
| O  | -3.74677174 | 0.66433439  | -4.04211282 |
| O  | -1.44296737 | 2.46896908  | -3.05162488 |
| H  | -0.94698450 | -3.35672726 | -1.87620693 |
| H  | 0.00871976  | -3.22490444 | -3.15227540 |
| H  | 0.39801617  | 0.03663601  | 2.41903299  |
| H  | 1.26490828  | 1.22112510  | 2.30705654  |
| H  | 5.46609592  | 0.42468189  | 0.73737379  |
| H  | 4.85400650  | 0.93116656  | -0.59803031 |
| H  | -3.34977195 | -2.16693316 | -2.21686289 |
| H  | -2.93091753 | -2.47562669 | -0.66675286 |
| H  | 7.29500988  | -1.18688729 | 2.11890671  |
| H  | 5.96677820  | -1.65059310 | 1.35103931  |
| H  | 0.13196088  | 3.08957641  | -0.86713303 |
| H  | -0.27577477 | 3.26634247  | 0.66262012  |
| H  | -2.86360172 | 0.52251608  | -4.52938270 |
| H  | -1.21773024 | -0.23470927 | -2.62048546 |
| H  | -1.44315353 | 2.49037948  | -3.97414975 |
| H  | -0.46202236 | 2.15346804  | -2.91719939 |

**TS Glyoxylic acid to Glyoxylic acid hydrate**

|   |            |             |             |
|---|------------|-------------|-------------|
| C | 1.36756500 | -0.24192800 | 0.12324000  |
| C | 2.73054100 | -0.72568800 | 0.25774800  |
| C | 3.54309200 | -1.71208300 | 0.70283100  |
| C | 1.03969000 | 1.00862100  | 0.34114000  |
| C | 1.73831700 | 2.09403700  | -0.09298400 |
| C | 3.05393200 | 1.67771300  | -0.68151600 |
| C | 3.49107000 | 0.29560100  | -0.59593800 |

|    |             |             |             |                               |               |               |               |
|----|-------------|-------------|-------------|-------------------------------|---------------|---------------|---------------|
| C  | 4.70057800  | -2.07380400 | 0.33472500  | H                             | 1.28973200    | 1.96029700    | -3.33120400   |
| C  | 5.39255800  | -1.56083000 | -0.78103400 | H                             | 0.71675600    | 0.56893900    | -2.88349800   |
| C  | 4.72551300  | -0.25570500 | -1.22163700 | H                             | -1.23574900   | -3.30292400   | -0.91699600   |
| C  | 1.56603800  | 3.43861600  | -0.18830700 | H                             | -1.91942400   | -4.58939300   | -1.49514500   |
| C  | 2.27381400  | 4.32309300  | -0.67454700 | H                             | -1.69209000   | -4.81080500   | -3.89709400   |
| C  | 3.48404200  | 4.06077000  | -1.35735400 | H                             | -2.93629500   | -3.94868200   | -4.27929200   |
| C  | 3.79491000  | 2.61256100  | -1.42049800 | H                             | -3.57083400   | -1.08021300   | -1.02794500   |
| C  | 4.85326500  | 2.10179500  | -2.25310300 | H                             | -2.53591900   | 0.79019900    | -2.39375100   |
| C  | 5.31786900  | 0.71456700  | -2.13968700 | H                             | -1.64151900   | -0.51876000   | -0.09270700   |
| C  | 6.52493000  | -1.78285800 | -1.56737800 | H                             | -0.50440200   | -0.95076000   | -3.23339500   |
| C  | 6.83885000  | -0.99978500 | -2.45028900 | <b>Glyoxylic acid hydrate</b> |               |               |               |
| C  | 6.45837400  | 0.26249900  | -2.96396300 | i = 179, E = -828.9790484655  |               |               |               |
| C  | 4.38485400  | 4.79600600  | -2.10106400 | C                             | -2.3044957010 | 0.2679334741  | -0.1914952913 |
| C  | 5.31142500  | 4.40139200  | -2.83306000 | C                             | -1.3173822582 | -0.6989929188 | -0.1275316787 |
| C  | 5.57448100  | 3.09566800  | -3.19882200 | C                             | -1.2173760128 | -2.0572264231 | 0.0626704704  |
| C  | 6.43382200  | 2.34530900  | -3.99251800 | C                             | -2.1709588180 | 1.5051628279  | -0.2473644665 |
| C  | 6.77371200  | 1.14195800  | -4.00832100 | C                             | -1.0062303720 | 2.2619290769  | -0.2255446661 |
| C  | -3.87488200 | -0.92480100 | -2.86327700 | C                             | 0.2175842025  | 1.4032594961  | -0.2225063721 |
| C  | -2.56239900 | -0.20538400 | -2.89985200 | C                             | 0.0700453147  | -0.0558280836 | -0.2844022030 |
| Pt | 3.00522300  | -0.82077200 | -2.43260200 | C                             | -0.1938878193 | -2.7766290055 | 0.0976326630  |
| Pt | 0.59467200  | -1.00352500 | -1.64594700 | C                             | 1.1271949607  | -2.4255174451 | -0.0408085687 |
| Pt | 1.14876700  | -2.00265000 | -3.96871900 | C                             | 1.2745446883  | -0.9063845038 | -0.2565430309 |
| Pt | 0.98085800  | 0.13479500  | -5.27720900 | C                             | -0.6926391505 | 3.6112912893  | -0.1657179514 |
| O  | 0.39700300  | 2.29781800  | -6.41589700 | C                             | 0.4424977388  | 4.1183582019  | -0.1101021435 |
| O  | 2.77089800  | 2.63141400  | -4.74798900 | C                             | 1.6730998369  | 3.4855427188  | -0.1126948525 |
| O  | 1.38129800  | -3.89441800 | -2.82354400 | C                             | 1.5336771835  | 1.9916636465  | -0.1644316829 |
| O  | 0.57381500  | 1.33789300  | -3.61499100 | C                             | 2.7230377224  | 1.1532752436  | -0.2149460875 |
| O  | -1.01589800 | -4.18601100 | -1.24419500 | C                             | 2.6079739627  | -0.2831253342 | -0.2335595945 |
| O  | 1.36477200  | -1.28614500 | -6.63268900 | C                             | 2.3740095195  | -3.0270930172 | -0.0595517290 |
| O  | 1.54744900  | -2.50322800 | -6.05473700 | C                             | 3.4965816259  | -2.5027731599 | -0.1942144407 |
| O  | -2.67222000 | -4.77400800 | -3.75852400 | C                             | 3.8199928767  | -1.1503050681 | -0.2813958737 |
| O  | -4.31786900 | -1.22873800 | -3.95202800 | C                             | 2.9999231566  | 3.8799224302  | -0.1328663310 |
| O  | -1.70169500 | -0.74096000 | -3.67107100 | C                             | 4.0130426800  | 3.1628746477  | -0.2134541975 |
| O  | -4.32261900 | -1.38879900 | -1.70176100 | C                             | 4.0867716214  | 1.7820258040  | -0.2778616268 |
| O  | -1.46227100 | -0.92578600 | -0.98749400 | C                             | 5.0884249958  | 0.8342317134  | -0.3835172592 |
| H  | -0.33847000 | 2.40532900  | -5.76331400 | C                             | 4.9828241871  | -0.4063561668 | -0.3849911426 |
| H  | 1.17545800  | 2.74891500  | -6.01505500 | C                             | -3.8463406976 | -2.2722726388 | -4.2332329867 |
| H  | 2.48933100  | 1.66741800  | -4.89950300 | C                             | -2.4747193374 | -1.6611132887 | -3.8658321451 |
| H  | 3.63997600  | 2.60427900  | -4.32052900 | Pt                            | 0.7612140620  | -0.6293740313 | -2.3546836179 |
| H  | 0.55831700  | -4.44950600 | -2.55113100 | Pt                            | 1.0880218662  | -1.3900229453 | -4.7503799789 |
| H  | 1.62673900  | -3.47963500 | -1.92302500 | Pt                            | 3.5677492905  | -0.9511631915 | -4.4085718154 |

|                                                 |               |               |               |    |             |             |             |
|-------------------------------------------------|---------------|---------------|---------------|----|-------------|-------------|-------------|
| Pt                                              | 2.2800485402  | 0.9795249749  | -3.6898971674 | C  | 0.59774100  | 0.50622100  | 1.64807700  |
| O                                               | 1.1860214848  | 2.9609750679  | -3.1528023595 | C  | 1.68064900  | -0.07391900 | 1.02767900  |
| O                                               | 1.5598886863  | -2.4672031183 | -6.7491887582 | C  | 1.33408800  | -1.10825500 | -0.00900200 |
| O                                               | 4.8103853682  | -2.7178633055 | -4.9519012810 | C  | 2.42125000  | -1.80389800 | -0.66802200 |
| O                                               | -0.9782571838 | 1.4577204085  | -4.1218044918 | C  | 2.10598200  | -2.80689500 | -1.67331500 |
| O                                               | 7.1168666728  | -1.7055642894 | -4.1066118511 | C  | 1.60631700  | -4.68679000 | -3.53183100 |
| O                                               | 4.0675743836  | 1.7224730192  | -4.1701420440 | C  | 2.75087800  | -4.25136200 | -3.42901400 |
| O                                               | 4.8216564463  | 0.5858635306  | -4.5736450763 | C  | 3.24931300  | -3.26737100 | -2.55796300 |
| O                                               | 3.0501394422  | -3.9478607645 | -3.2574223947 | C  | 3.00670100  | 0.13357300  | 1.02741900  |
| O                                               | -4.8649564132 | -1.6018638342 | -4.3128039737 | C  | 3.97310300  | -0.31271900 | 0.38088900  |
| O                                               | -1.9184624209 | -1.0534791483 | -5.0307159075 | C  | 3.78812600  | -1.22122800 | -0.65511600 |
| O                                               | -3.8244938338 | -3.5961920820 | -4.4872975061 | C  | 4.43239300  | -1.40415500 | -1.91722300 |
| O                                               | -1.6640641518 | -2.7319355010 | -3.4286094719 | C  | 4.30061600  | -2.42146300 | -2.71706600 |
| H                                               | 0.2543629646  | 2.7730651508  | -3.4330677607 | C  | -2.86668300 | -0.51567600 | -4.00482600 |
| H                                               | 1.5057496343  | 3.6656269586  | -3.7445460386 | C  | -1.77731700 | 0.39324800  | -4.16457500 |
| H                                               | 2.5354113511  | -2.5185127689 | -6.6562605696 | Pt | 0.47167500  | -1.08405400 | -2.81592300 |
| H                                               | 1.4081843128  | -1.8265723366 | -7.4692939637 | Pt | 2.00048600  | -0.82058300 | -4.79848900 |
| H                                               | 5.7544484754  | -2.4925279734 | -4.6761178507 | Pt | 3.91813500  | -0.02151800 | -3.21653400 |
| H                                               | 4.4240332837  | -3.3491779422 | -4.2815434543 | Pt | 1.78494200  | 1.12824500  | -2.83743000 |
| H                                               | -0.6725367067 | 0.8805388508  | -3.3545984288 | O  | 0.19835500  | 2.60219300  | -2.59625100 |
| H                                               | -0.2439242081 | 1.2551858193  | -4.7471293773 | O  | 2.98820000  | -1.52343600 | -6.58708200 |
| H                                               | 8.0838717792  | -1.7925755381 | -4.2854066200 | O  | 5.39545300  | -0.17990300 | -5.18312600 |
| H                                               | 6.9302132383  | -0.7497148578 | -4.0908552171 | O  | 0.28176946  | 2.76061095  | 0.17484653  |
| H                                               | 3.1657661849  | -3.7010694786 | -2.3175326059 | O  | 8.07777000  | -0.50688500 | -4.00349400 |
| H                                               | 2.3410097522  | -3.3275837836 | -3.5600425607 | O  | 3.14145100  | 2.64960700  | -2.58909500 |
| H                                               | -2.9015273271 | -3.8924054064 | -4.2848857387 | O  | 4.31243600  | 2.05873300  | -2.92930700 |
| H                                               | -2.6294152239 | -0.9068599530 | -3.0757944128 | O  | 5.29513000  | -2.94447400 | -5.70552900 |
| H                                               | -0.7466037297 | -2.3654762831 | -3.2814934102 | O  | -3.44261000 | -0.49026500 | -2.97233700 |
| H                                               | -1.8191838311 | -0.0892741881 | -4.8308677681 | O  | -1.80047000 | 1.50920000  | -3.44970800 |
| <b>TS Glyoxylic acid hydrate to oxalic acid</b> |               |               |               | O  | -3.07557900 | -1.38958700 | -5.03558500 |
| C                                               | -2.61994000   | -1.95988400   | -0.85334200   | O  | -1.22588700 | 0.40179200  | -5.45520800 |
| C                                               | -1.79232100   | -2.76920000   | -1.57259800   | H  | -0.51284300 | 2.33046200  | -3.24914600 |
| C                                               | -1.90440200   | -3.80318500   | -2.51648200   | H  | 0.55408000  | 3.39307300  | -3.06793900 |
| C                                               | -2.36418800   | -1.12702800   | 0.01220700    | H  | 3.48337400  | -0.80117200 | -7.00254400 |
| C                                               | -1.08694100   | -0.73460500   | 0.47092800    | H  | 2.25177300  | -1.64980700 | -7.24845700 |
| C                                               | -0.03162800   | -1.38907500   | -0.32045100   | H  | 6.26653800  | 0.09791400  | -5.06399500 |
| C                                               | -0.34013700   | -2.46023800   | -1.28991700   | H  | 5.41127200  | -1.07417600 | -5.47485400 |
| C                                               | -0.95727500   | -4.49645600   | -2.91127400   | H  | -0.50019154 | 2.18747095  | 0.37361653  |
| C                                               | 0.41072900    | -4.27626000   | -2.94858600   | H  | -1.43206800 | 0.68199000  | 2.08075100  |
| C                                               | 0.70939900    | -3.18890500   | -1.99535300   | H  | 7.94876300  | 0.05676200  | -3.24132900 |
| C                                               | -0.70443200   | 0.14024700    | 1.60738000    | H  | 9.00464700  | -0.80565300 | -3.97195300 |

|   |             |             |             |   |               |               |               |
|---|-------------|-------------|-------------|---|---------------|---------------|---------------|
| H | 5.08956700  | -3.30875300 | -4.81371200 | H | 2.2332274690  | 0.0468256144  | -6.1498606964 |
| H | 4.52526200  | -3.04855200 | -6.28640300 | O | 4.0112193403  | -1.9686480942 | -3.3593312017 |
| H | -2.36558900 | -1.28501600 | -5.67997600 | H | 4.8113639037  | -1.3827834536 | -3.2922427374 |
| H | -0.63943200 | -0.36914700 | -3.62491300 | H | 3.8680351766  | -2.4929367157 | -2.5206310929 |
| H | -0.28088400 | 0.63095500  | -5.35602600 | O | -2.3550045309 | -1.6896934473 | -2.9158852713 |
| H | -0.00400454 | 3.47010695  | 0.76992753  | H | -2.3888272977 | -1.0061589768 | -2.2176713660 |

**Oxalic acid**

i = 227, E = -827.7938689194

|    |               |               |               |
|----|---------------|---------------|---------------|
| C  | -1.4715887563 | 1.0273821554  | 1.4371234658  |
| C  | -0.5648725534 | 0.0046901422  | 1.6068440160  |
| C  | -0.4666220594 | -1.1873442023 | 2.2985232986  |
| C  | -1.3493773194 | 2.0858637220  | 0.7847255312  |
| C  | -0.2704677470 | 2.5384384497  | 0.0589613806  |
| C  | 0.8902817598  | 1.5441365194  | 0.0878446676  |
| C  | 0.7459728692  | 0.2892029364  | 0.8536097913  |
| C  | 0.5092138824  | -1.9533442444 | 2.4078122118  |
| C  | 1.7892733921  | -1.8028151678 | 1.8952428415  |
| C  | 1.9294105973  | -0.5569817567 | 1.0761579271  |
| C  | 0.0742873048  | 3.6654291569  | -0.6715144923 |
| C  | 1.1610567511  | 3.9233813115  | -1.2243295053 |
| C  | 2.3445124833  | 3.1923198933  | -1.2158019659 |
| C  | 2.2063111383  | 1.9245294914  | -0.4397440386 |
| C  | 3.3383340437  | 1.0492556357  | -0.2566948982 |
| C  | 3.2082120913  | -0.1790306077 | 0.5146771417  |
| C  | 2.9877492033  | -2.4984860519 | 1.9645095611  |
| C  | 4.0855862360  | -2.1959166139 | 1.4590944138  |
| C  | 4.3967880338  | -1.0727189337 | 0.7019725849  |
| C  | 3.6143923491  | 3.3388378551  | -1.7430982558 |
| C  | 4.5893056944  | 2.5773967255  | -1.6085243736 |
| C  | 4.6541163864  | 1.3969851471  | -0.8902396567 |
| C  | 5.6169207203  | 0.4456771374  | -0.6124727988 |
| C  | 5.5290025585  | -0.6006528897 | 0.0543452960  |
| Pt | 0.3531559282  | -0.2134135331 | -1.2330963219 |
| Pt | -0.0885325519 | -1.5049913557 | -3.3701726840 |
| Pt | 2.3178090148  | -0.5523590886 | -3.3499025511 |
| Pt | 0.6136592828  | 1.1628382763  | -3.4719170522 |
| O  | -0.9644914602 | 2.8683219142  | -3.5846379118 |
| H  | -1.0070000114 | 3.2276229291  | -4.4897688449 |
| H  | -0.6000551851 | 3.5774003686  | -3.0152828428 |
| O  | 1.7081237761  | -0.5393202177 | -6.7494759449 |
| H  | 1.6825177846  | -1.3922434744 | -6.2626313315 |

|   |               |               |               |
|---|---------------|---------------|---------------|
| H | -2.7287732308 | -1.2517711319 | -3.7404496025 |
| O | 5.6817244616  | 0.1817726132  | -3.7392811233 |
| H | 6.2707170853  | 0.1026460748  | -4.5087151007 |
| H | 4.9142276531  | 0.7141454647  | -4.0577935393 |
| O | 2.0521890067  | 1.9286847186  | -4.5912580999 |
| O | 3.0722832809  | 0.9002504807  | -4.6346911791 |
| O | 2.7829102340  | -3.3106100707 | -1.3888812487 |
| H | 2.9488598359  | -3.1587773260 | -0.4389289624 |
| H | 1.9809439517  | -2.7768929899 | -1.5865949590 |
| O | -2.6507250259 | -0.4581735254 | -5.3230447531 |
| C | -1.5242364648 | -0.7645443832 | -5.7346546696 |
| C | -0.9761695885 | -2.1712156574 | -5.4326750476 |
| O | 0.2328582228  | -2.5435879064 | -5.4682918926 |
| H | 0.2243423038  | -0.2395778425 | -6.5769645753 |
| O | -1.9901453190 | -3.0850370551 | -5.3760713865 |
| O | -0.7741929952 | 0.0524398174  | -6.4487863001 |
| H | -1.5600913080 | -3.9502819013 | -5.2118612250 |

**TS Oxalic acid decomposition**

|   |            |            |             |
|---|------------|------------|-------------|
| C | 0.66170900 | 2.71541200 | -1.05162600 |
| C | 1.77434300 | 1.99700700 | -0.67946800 |
| C | 2.03831500 | 1.06298700 | 0.49941000  |
| C | 0.40242900 | 3.51879900 | -1.96121400 |
| C | 1.31252800 | 3.87829900 | -2.94696900 |
| C | 2.62185300 | 3.17102700 | -2.79674600 |
| C | 2.83686800 | 2.32180600 | -1.57769300 |
| C | 3.29776100 | 0.79704800 | 0.69166700  |
| C | 4.38469800 | 0.96838500 | -0.11021100 |
| C | 4.09560800 | 1.70056300 | -1.39933000 |
| C | 1.35979300 | 4.68120800 | -4.05637100 |
| C | 2.25042500 | 4.82903700 | -4.92930500 |
| C | 3.48430800 | 4.16236600 | -4.96986400 |
| C | 3.71516000 | 3.40586800 | -3.71938500 |
| C | 4.94020100 | 2.65750300 | -3.58088400 |
| C | 5.14728500 | 1.77858200 | -2.44953700 |
| C | 5.69975100 | 0.50781500 | -0.13217300 |

|                            |             |             |                 |    |               |               |               |
|----------------------------|-------------|-------------|-----------------|----|---------------|---------------|---------------|
| C                          | 6.52879200  | 0.43095200  | -1.04791300     | C  | -0.6005100678 | 0.4507883659  | 1.3259202355  |
| C                          | 6.46622300  | 1.09109700  | -2.23214400     | C  | 0.4812419568  | -0.4011678517 | 1.3298136804  |
| C                          | 4.47687100  | 3.99776800  | -5.91739300     | C  | 0.8294380047  | -1.6187246227 | 1.8811372143  |
| C                          | 5.45231600  | 3.30322000  | -5.75964400     | C  | -0.7324872628 | 1.5480728110  | 0.7468770128  |
| C                          | 5.93244700  | 2.55975600  | -4.70064000     | C  | 0.1728636962  | 2.2107309506  | -0.0569241652 |
| C                          | 7.06874400  | 1.77510100  | -4.38654000     | C  | 1.4821930155  | 1.4520672856  | -0.1691755506 |
| C                          | 7.28021800  | 1.10619800  | -3.36332900     | C  | 1.6344728550  | 0.1560584801  | 0.4962845438  |
| Pt                         | 0.76560700  | 0.00725500  | -0.74975200     | C  | 1.9197623580  | -2.2195043368 | 1.8410003842  |
| Pt                         | -0.20960300 | -2.10562700 | -1.83786500     | C  | 3.1101325716  | -1.7869353186 | 1.2686106275  |
| Pt                         | 1.84347500  | -0.62468800 | -3.04639600     | C  | 2.9525179719  | -0.4777497087 | 0.5584232550  |
| Pt                         | -0.46517400 | 0.15590400  | -3.22376300     | C  | 0.2051795830  | 3.3747354549  | -0.8059425641 |
| O                          | -2.71311900 | 0.97324300  | -3.38281900     | C  | 1.1575590011  | 3.8261907869  | -1.4682600468 |
| H                          | -3.35151300 | 0.88362200  | -2.68143700     | C  | 2.4452070142  | 3.3321780758  | -1.5968728179 |
| H                          | -2.93390200 | 0.32950400  | -4.13608000     | C  | 2.6290619377  | 2.0547138036  | -0.8363495586 |
| O                          | -1.23409000 | -3.75714000 | -4.26037600     | C  | 3.9148232545  | 1.3992497602  | -0.8012731087 |
| H                          | -0.94322700 | -4.70418500 | -4.27566800     | C  | 4.0832653618  | 0.1467917223  | -0.0865864809 |
| H                          | -0.46758900 | -3.35454600 | -3.63715200     | C  | 4.4087985947  | -2.2608524238 | 1.1920413126  |
| O                          | 3.86249400  | -1.33495300 | -2.86140400     | C  | 5.3852949413  | -1.7290910661 | 0.6331240105  |
| H                          | 4.26182300  | -1.58725400 | -3.72046600     | C  | 5.4203871386  | -0.5289480504 | -0.0564403262 |
| H                          | 4.06259500  | -2.14778200 | -2.35110800     | C  | 3.6097708302  | 3.7164840704  | -2.2368116541 |
| O                          | -2.28086900 | -0.91833400 | -5.48455500     | C  | 4.7207236675  | 3.1570558783  | -2.2197569208 |
| H                          | -1.94685800 | -1.81928900 | -5.57635900     | C  | 5.0691684590  | 1.9990859384  | -1.5490219442 |
| H                          | -1.40496900 | -0.42614300 | -5.60857600     | C  | 6.2100949177  | 1.2345136758  | -1.3907109051 |
| O                          | 4.85335400  | -0.70818800 | -5.59719900     | C  | 6.3885196935  | 0.1625700227  | -0.7812951996 |
| H                          | 4.51294200  | 0.19489000  | -5.45591700     | Pt | 1.0423133566  | -0.3606582839 | -1.7517018838 |
| H                          | 5.82010000  | -0.63011800 | -5.57116800     | Pt | 0.5708108615  | -1.4923040996 | -3.9850413015 |
| O                          | 0.34445200  | 0.91264400  | -4.91161200     | Pt | 3.1211872541  | -0.8996266216 | -3.4553806218 |
| O                          | 1.59717200  | 0.34091100  | -4.90783200     | Pt | 1.4049723597  | 1.0003844196  | -4.0196038892 |
| O                          | 3.26846100  | -2.24621500 | -0.29859600     | O  | -0.5367618755 | 1.8820163022  | -4.2111108129 |
| H                          | 2.30452200  | -2.26576200 | -0.01084700     | H  | -0.9782556148 | 1.6471998693  | -3.3719993066 |
| H                          | 3.50936600  | -1.29653200 | -0.24393700     | H  | -0.9923142781 | 1.2932280318  | -4.9468004556 |
| O                          | -4.27912400 | -1.79314400 | -1.88518000     | O  | 0.2715234887  | -1.5317892472 | -6.0423823946 |
| C                          | -3.36176700 | -2.48733000 | -2.22659300     | H  | 0.2890652609  | -2.4188947051 | -6.4384683729 |
| C                          | -1.94333700 | -2.84058800 | -1.01163300     | H  | 1.4896814235  | -0.2805407418 | -6.6473586182 |
| O                          | -1.47715200 | -4.00858400 | -1.36678200     | O  | 3.7990786713  | -2.8312503295 | -2.9820787424 |
| H                          | -2.15351400 | -3.57699700 | -3.52767100     | H  | 4.7366929388  | -2.8151521115 | -2.6357002937 |
| O                          | -2.41017700 | -2.43677500 | 0.19505000      | H  | 3.1625450831  | -3.2122890354 | -2.2851130378 |
| O                          | -3.29898200 | -3.36547600 | -3.19473400     | O  | -1.5648327271 | 0.3405769867  | -6.0096924725 |
| H                          | -2.14336000 | -3.19480400 | 0.79089900      | H  | -2.4334545608 | -0.0368620805 | -5.7954628802 |
| <b>Reactant O2 to H2O2</b> |             |             |                 | H  | -0.9336654710 | -0.4556184426 | -6.1108888418 |
| i =                        | 337,        | E =         | -785.4809026581 | O  | 6.4128590314  | -2.6024160412 | -2.3563874558 |

|   |               |               |               |
|---|---------------|---------------|---------------|
| H | 6.9172277321  | -2.7354419066 | -3.1779448731 |
| H | 6.5070965824  | -1.6493638965 | -2.1480262020 |
| O | 1.5591856245  | 1.4970020636  | -5.9498513374 |
| O | 2.1801791355  | 0.4504374874  | -6.6892309659 |
| O | 1.8290048940  | -3.6677704888 | -1.4728971443 |
| H | 1.2001551112  | -3.1316512460 | -2.0243403860 |
| H | 1.7570346058  | -3.2701901064 | -0.5845305292 |
| H | 3.0992639322  | 0.7306564974  | -3.9216455743 |
| H | 4.5482820587  | -0.3425201824 | -3.1218746573 |
| H | 0.1985957578  | -2.9963228166 | -3.7486982180 |
| H | -0.4748925497 | -0.2950611359 | -1.4180733443 |
| O | -2.2656274669 | -2.4049008621 | -0.7080119995 |
| O | -1.2383916385 | -3.0811624067 | -0.7148888744 |

**TS O2 to H2O2**

|    |             |             |             |
|----|-------------|-------------|-------------|
| C  | 2.77476300  | 0.91851300  | 1.51009800  |
| C  | 3.58158900  | 0.02320200  | 0.91454500  |
| C  | 4.07555400  | -1.24347500 | 1.04025900  |
| C  | 1.97407700  | 1.82087800  | 1.13679800  |
| C  | 2.12832000  | 2.48679100  | -0.04456200 |
| C  | 3.23515900  | 1.82919100  | -0.93520900 |
| C  | 3.80111400  | 0.55779400  | -0.55537000 |
| C  | 4.84225200  | -1.86357800 | 0.26861000  |
| C  | 5.35820900  | -1.50573600 | -0.91402200 |
| C  | 4.90361000  | -0.07253600 | -1.24757200 |
| C  | 1.72459600  | 3.62305200  | -0.64890300 |
| C  | 2.22424700  | 4.36218900  | -1.49643600 |
| C  | 3.39144600  | 3.98777200  | -2.22495400 |
| C  | 3.85227300  | 2.57940100  | -2.01163400 |
| C  | 4.99448500  | 2.01519100  | -2.69042300 |
| C  | 5.49764200  | 0.66889700  | -2.37167100 |
| C  | 6.35167600  | -1.82844800 | -1.84527000 |
| C  | 6.82160300  | -1.18959800 | -2.79808800 |
| C  | 6.55801300  | 0.09336400  | -3.22256900 |
| C  | 4.18213500  | 4.55456900  | -3.20651200 |
| C  | 5.20151400  | 4.14792100  | -3.81948300 |
| C  | 5.66836000  | 2.83105700  | -3.74104500 |
| C  | 6.61230200  | 2.09610600  | -4.45067500 |
| C  | 6.96550800  | 0.94040300  | -4.22674100 |
| Pt | 1.67493200  | 0.38199100  | -1.58131600 |
| Pt | -0.30835800 | -0.97964200 | -2.57366800 |
| Pt | 2.16160900  | -1.88419900 | -2.64215700 |

|    |             |             |             |
|----|-------------|-------------|-------------|
| Pt | 1.57802300  | 0.41037400  | -4.18290900 |
| O  | -1.68706700 | 1.80539000  | -6.41554900 |
| H  | -1.55657500 | 1.14348500  | -5.68117800 |
| H  | -1.75327000 | -1.18410300 | -5.25393200 |
| O  | -4.98347500 | -1.72548000 | -3.99306900 |
| H  | -3.97359700 | -1.71713500 | -3.81949900 |
| H  | 0.30752000  | 2.25546500  | -6.35388100 |
| O  | 2.41491600  | -4.23433000 | -2.35299400 |
| H  | 1.62494700  | -4.35274000 | -1.76579900 |
| H  | 2.07809800  | -4.52049400 | -3.22044200 |
| O  | -1.19454200 | -1.53309000 | -4.51381500 |
| H  | -2.22672200 | 1.22013000  | -7.01501600 |
| H  | -5.30413200 | -2.26984500 | -3.23251800 |
| O  | 0.55040300  | -4.39292500 | -0.34913500 |
| H  | 0.20438400  | -5.02313800 | 0.29009700  |
| H  | -0.13693400 | -3.70551700 | -0.40650800 |
| O  | 2.05962700  | 1.43011700  | -5.79064600 |
| O  | 1.23769100  | 2.26531800  | -6.69529100 |
| O  | 0.15803100  | -4.88625200 | -3.74410800 |
| H  | -0.35378800 | -5.19452000 | -4.47499700 |
| H  | -0.43098300 | -4.19423100 | -3.32865200 |
| H  | 2.66950600  | -0.82166400 | -3.98351200 |
| H  | 3.70987200  | -2.07845900 | -2.64129300 |
| H  | -0.22520700 | -0.67695400 | -1.06613300 |
| H  | -1.83100200 | -2.15841100 | -3.82592400 |
| O  | -1.76515900 | -3.03115700 | -2.85093600 |
| O  | -1.41927000 | -2.40104800 | -1.68214800 |

**Product O2 to H2O2**

|   |              |               |               |
|---|--------------|---------------|---------------|
| C | 1.7225745031 | 1.9449053364  | 2.0066748617  |
| C | 2.8813868578 | 1.2134860929  | 2.1287672607  |
| C | 3.5719670543 | 0.4963994863  | 3.0857230370  |
| C | 1.2816633876 | 2.5145250784  | 0.9865741736  |
| C | 1.8160678623 | 2.6435259350  | -0.2797037576 |
| C | 3.1207235447 | 1.8928072558  | -0.3704771384 |
| C | 3.6378509902 | 1.1472780660  | 0.7911097673  |
| C | 4.6665004298 | -0.0900569326 | 2.9819055169  |
| C | 5.5394367600 | -0.1479144312 | 1.9044160497  |
| C | 5.0035115722 | 0.6034815408  | 0.7283904785  |
| C | 1.4190213022 | 3.3506824554  | -1.4079180038 |
| C | 2.1563156330 | 3.5831527739  | -2.5229414095 |
| C | 3.4750617176 | 3.0371865186  | -2.5643316775 |

|    |               |               |               |                                                   |               |                             |
|----|---------------|---------------|---------------|---------------------------------------------------|---------------|-----------------------------|
| C  | 3.9998414094  | 2.1929578424  | -1.4971734688 | <b>Reactant Glycolaldehyde to ethylene glycol</b> |               |                             |
| C  | 5.3257510503  | 1.6336055492  | -1.5410983162 | i =                                               | 130, E =      | -798.1168189208             |
| C  | 5.8156517329  | 0.8128266735  | -0.4459200458 | C                                                 | -1.6205568950 | 0.8098824530 1.4827100587   |
| C  | 6.7985705533  | -0.6663726735 | 1.6510652321  | C                                                 | -0.7174143563 | -0.2272105695 1.5490392095  |
| C  | 7.4896138671  | -0.5192542327 | 0.6265582160  | C                                                 | -0.6286993666 | -1.4849356754 2.1121390833  |
| C  | 7.1865615803  | 0.1992503771  | -0.5185208582 | C                                                 | -1.5096498522 | 1.9323119862 0.9447740319   |
| C  | 4.4196145102  | 3.1912530009  | -3.5702237561 | C                                                 | -0.4389635048 | 2.4529709313 0.2529863234   |
| C  | 5.5658038598  | 2.7212741433  | -3.6541072120 | C                                                 | 0.7213010046  | 1.4465618077 0.1881898945   |
| C  | 6.1920966885  | 1.8936206199  | -2.7368470788 | C                                                 | 0.5925986084  | 0.1272299615 0.8437428421   |
| C  | 7.4072423211  | 1.2384361771  | -2.6266785775 | C                                                 | 0.3544081181  | -2.2466314859 2.1853358645  |
| C  | 7.8310020226  | 0.5214489025  | -1.7018909262 | C                                                 | 1.6526481477  | -2.0120842702 1.7567745011  |
| Pt | 2.6386199743  | -0.3116945773 | -0.5698339470 | C                                                 | 1.7857724868  | -0.7052254208 1.0383756045  |
| Pt | 0.3652950946  | -0.3791878682 | -2.0973531465 | C                                                 | -0.0867899203 | 3.6166094248 -0.4068729730  |
| Pt | 1.7624123965  | -2.4295345185 | -1.7041574730 | C                                                 | 0.9809754496  | 3.8971144844 -0.9944516093  |
| Pt | 2.6450501812  | -0.5636037966 | -3.2352027493 | C                                                 | 2.1483737082  | 3.1487845471 -1.0876355572  |
| O  | 3.4552152599  | 0.5513242779  | -4.6309053218 | C                                                 | 2.0274894691  | 1.8378132462 -0.3637907992  |
| H  | 1.7936467360  | 4.1627841911  | -3.3728990925 | C                                                 | 3.1862769961  | 0.9808568309 -0.1946891924  |
| H  | 3.3445581272  | -0.0053232580 | -5.4385235871 | C                                                 | 3.0758722735  | -0.2652976664 0.5434447572  |
| O  | 0.8148529391  | 1.1308841383  | -5.6260277888 | C                                                 | 2.8734666974  | -2.6641178633 1.8469434868  |
| H  | 0.0937295301  | 1.1567887336  | -4.9726584159 | C                                                 | 3.9850042791  | -2.3002525816 1.4173017805  |
| H  | 1.6397843760  | 1.1535063415  | -5.0820920656 | C                                                 | 4.2855846241  | -1.1274880479 0.7319106351  |
| O  | 3.0853237367  | -4.1348185249 | -1.8502510686 | C                                                 | 3.4052186978  | 3.3039897984 -1.6385640211  |
| H  | 3.2859410873  | -4.1394520520 | -2.8439519857 | C                                                 | 4.3914518955  | 2.5468791448 -1.5502874996  |
| H  | 3.9239087795  | -3.8049800478 | -1.4001030645 | C                                                 | 4.4874749943  | 1.3720642476 -0.8208556461  |
| O  | -0.6761859691 | 1.5780018974  | -2.6966720907 | C                                                 | 5.4798047682  | 0.4509576012 -0.5338369488  |
| H  | -1.4381374825 | 1.4084642458  | -2.0287814823 | C                                                 | 5.4171896760  | -0.6054185125 0.1201582806  |
| H  | -0.1159303965 | 2.2925356474  | -2.3102207226 | Pt                                                | 0.3810590689  | 0.0924618029 -1.4272344816  |
| O  | 3.4616009567  | -4.0345838474 | -4.5073809672 | Pt                                                | -0.3307530493 | -1.3307091561 -3.6491739797 |
| H  | 3.3950980780  | -4.8693342886 | -5.0008686256 | Pt                                                | 2.2938023234  | -0.6167752205 -3.8155985933 |
| H  | 2.8522526207  | -3.4043035870 | -4.9818487299 | Pt                                                | 0.6740944835  | 1.2114971312 -3.7890903256  |
| O  | 1.9914085114  | -1.2398379264 | -6.5022673373 | O                                                 | -0.6824008981 | 3.0941642795 -3.5919050067  |
| O  | 1.5218996990  | -2.2684482528 | -5.5561715830 | H                                                 | -0.3799524436 | 3.7724755754 -4.2229587948  |
| O  | 5.0577144608  | -2.8138900341 | -0.5693043190 | H                                                 | -0.4211648409 | 3.4313812941 -2.7028563251  |
| H  | 4.4140699299  | -2.0896474458 | -0.3816429979 | O                                                 | 2.4629632128  | -1.6074498940 -6.8479026815 |
| H  | 5.6822209531  | -2.4075716613 | -1.1971469412 | H                                                 | 3.1448830414  | -2.2705913419 -6.6419233378 |
| H  | 1.3097240076  | -0.5219550619 | -6.3615613366 | H                                                 | 2.3085015003  | -1.1711454902 -5.9558250752 |
| H  | 1.6081575737  | -1.7873186915 | -4.6668850851 | O                                                 | 4.0519006782  | -1.9769132764 -3.7263755079 |
| H  | -0.5046594550 | -1.0376283827 | -3.1962010613 | H                                                 | 4.8173374723  | -1.3507535631 -3.5744244213 |
| H  | 2.0540260172  | -0.8220104223 | 0.7749722621  | H                                                 | 3.8484948988  | -2.4538691006 -2.8694500173 |
| O  | -2.1550555902 | 0.5355764759  | -0.9071946636 | O                                                 | -2.4903344456 | -1.1942298130 -4.0522681387 |
| O  | -1.2681547059 | -0.4281922450 | -0.7788499961 | H                                                 | -2.8509308544 | -0.4991626085 -3.4719328507 |

|   |               |               |               |
|---|---------------|---------------|---------------|
| H | -2.5290707411 | -0.8249680846 | -5.0127411234 |
| O | 5.8024175472  | 0.1113618658  | -3.6524105299 |
| H | 6.3690763588  | 0.1283269932  | -4.4423170831 |
| H | 5.0771540849  | 0.7548807095  | -3.8507366176 |
| O | 2.3503032760  | 2.0807252095  | -4.4149162023 |
| O | 3.3400407042  | 1.0635125450  | -4.3470041783 |
| O | 2.8415724088  | -3.1084309139 | -1.5898467232 |
| H | 3.1667548032  | -3.1030508505 | -0.6695359871 |
| H | 2.1114529816  | -2.4535435338 | -1.5980257162 |
| O | -2.3173101417 | -0.3294263229 | -6.4976125834 |
| C | -1.4636663795 | -0.9462775320 | -7.1566309168 |
| C | -0.8211398947 | -2.2230305589 | -6.7039860766 |
| O | 0.1309629998  | -2.7506038284 | -7.5760077037 |
| H | -1.6124185778 | -2.9679374462 | -6.5003184601 |
| H | -0.3931426955 | -1.9965612202 | -5.6459639516 |
| H | 1.0181750721  | -2.3350214451 | -7.3651924166 |
| H | -1.1191189489 | -0.5472487731 | -8.1312956841 |
| H | -0.6910836158 | -1.0995952008 | -1.8897709338 |
| H | 1.2873477308  | -2.0036071405 | -3.6957107411 |

**TS Glycolaldehyde to ethylene glycol**

|   |             |            |             |
|---|-------------|------------|-------------|
| C | -1.64432500 | 3.30920700 | -2.17339500 |
| C | -1.89900400 | 2.57025300 | -1.04102100 |
| C | -2.97810200 | 2.16432800 | -0.26728900 |
| C | -0.65949800 | 3.57031000 | -2.88849900 |
| C | 0.66700100  | 3.26787500 | -2.59555700 |
| C | 0.70938500  | 2.55001900 | -1.28593000 |
| C | -0.47418000 | 2.13200800 | -0.53910200 |
| C | -2.89803100 | 1.70745300 | 0.87693900  |
| C | -1.70939900 | 1.57998300 | 1.65286500  |
| C | -0.42960900 | 1.84159400 | 0.93446600  |
| C | 1.84450700  | 3.06912500 | -3.31264000 |
| C | 2.98438300  | 2.65120700 | -2.80739000 |
| C | 3.19143900  | 2.43425800 | -1.43478800 |
| C | 1.99287500  | 2.24498800 | -0.59881500 |
| C | 2.06440100  | 2.12088800 | 0.84562300  |
| C | 0.87177900  | 1.91773700 | 1.59150600  |
| C | -1.43978000 | 1.66813900 | 3.01581900  |
| C | -0.34727300 | 1.73193200 | 3.63638300  |
| C | 0.95027400  | 1.70759200 | 3.12580000  |
| C | 4.31005900  | 2.35795700 | -0.62967100 |
| C | 4.33362100  | 2.29265100 | 0.59865700  |

|    |             |              |             |
|----|-------------|--------------|-------------|
| C  | 3.38607400  | 2.07727500   | 1.55890600  |
| C  | 3.28925200  | 1.58822700   | 2.83577200  |
| C  | 2.25557200  | 1.44399700   | 3.51541400  |
| Pt | 0.81044300  | 0.44394400   | -1.62340600 |
| Pt | 0.58934200  | -1.40344500  | -3.62905800 |
| Pt | 2.11127500  | -0.82427000  | -5.68160500 |
| Pt | 1.96939500  | 0.99516500   | -3.87856200 |
| O  | -3.04757900 | -0.37795700  | -3.26602100 |
| H  | -2.35589900 | -0.73443800  | -3.89291300 |
| H  | -2.60560800 | -0.58650000  | -2.42477200 |
| O  | -8.93636100 | -1.00937500  | -2.53757500 |
| H  | -9.29879100 | -0.14919900  | -2.81894500 |
| H  | -7.99006700 | -0.82924300  | -2.66162700 |
| O  | 2.80604400  | -2.09370800  | -7.33270000 |
| H  | 3.62121700  | -1.77770000  | -7.81608600 |
| H  | 3.14002000  | -2.96544800  | -6.98331300 |
| O  | 1.53679900  | -10.60310600 | 17.51786000 |
| H  | 2.19975100  | -11.16643000 | 17.08266400 |
| H  | 1.92669000  | -10.36315000 | 18.39248500 |
| O  | 3.24451600  | -3.42151000  | -2.72320000 |
| H  | 2.38858500  | -3.15548600  | -2.33598800 |
| H  | 3.49949600  | -2.52884000  | -3.07610400 |
| O  | 3.06240200  | 1.62064400   | -5.65461400 |
| O  | 3.02421400  | 0.59619600   | -6.55662600 |
| O  | 3.80569200  | -4.03864700  | -5.79846000 |
| H  | 3.35356700  | -4.91292800  | -5.99344900 |
| H  | 3.24888300  | -3.62223600  | -5.08608600 |
| O  | -0.13783500 | -2.95587100  | -2.24271500 |
| C  | -0.54050100 | -3.24379000  | -3.52823600 |
| C  | 0.24077300  | -4.39931500  | -4.20392200 |
| O  | 0.64771900  | -4.13898100  | -5.65555000 |
| H  | -0.30124200 | -5.32031300  | -4.10781400 |
| H  | 1.11344700  | -4.50654800  | -3.60374200 |
| H  | -0.05515900 | -3.65159500  | -6.08254600 |
| H  | -1.62281800 | -3.16090200  | -3.72790700 |
| H  | 0.46596900  | -1.22610000  | -1.43464700 |
| H  | 0.18174600  | -2.06770200  | -4.82392800 |
